1 Are indigenous territories and community-managed areas effective natural climate solutions? A  
2 neotropical analysis using matching methods and geographic discontinuity designs.

3

4 Camilo Alejo<sup>1\*</sup>, Chris Meyer<sup>2,3</sup>, Wayne S. Walker<sup>4</sup>, Seth R. Gorelik<sup>4</sup>, Carmen Josse<sup>5,6</sup>, Jose Luis  
5 Aragon-Osejo<sup>7</sup>, Sandra Rios<sup>5,8</sup>, Cicero Augusto<sup>5,9</sup>, Andres Llanos<sup>10</sup>, Oliver T. Coomes<sup>11</sup>,  
6 Catherine Potvin<sup>1,12</sup>

7

8 <sup>1</sup>Department of Biology, McGill University, Montreal, Quebec, Canada.

9 <sup>2</sup> Environmental Defense Fund, Washington, DC, United States of America.

10 <sup>3</sup> Local Energy Alliance Program, Charlottesville, Virginia, United States of America.

11 <sup>4</sup> Woodwell Climate Research Center, Falmouth, Massachusetts, United States of America.

12 <sup>5</sup> Red Amazónica de Información Socioambiental Georreferenciada, São Paulo, Brazil.

13 <sup>6</sup> Fundación EcoCiencia, Quito, Ecuador.

14 <sup>7</sup> Natural Resources and Environmental Studies Institute, University of Northern British  
15 Columbia, Prince George, British Columbia, Canada.

16 <sup>8</sup> Instituto del Bien Común, Lima, Perú.

17 <sup>9</sup> Instituto Socioambiental, São Paulo, Brasil.

18 <sup>10</sup> Fundación GAIA Amazonas, Bogotá, Colombia.

19 <sup>11</sup> Department of Geography, McGill University, Montreal, Quebec, Canada.

20 <sup>12</sup> Smithsonian Tropical Research Institute, Panama City, Republic of Panama

21

22 \*Corresponding author

23 E-mail: [edgar.alejomonroy@mail.mcgill.ca](mailto:edgar.alejomonroy@mail.mcgill.ca)

24

## 25 Abstract:

26 Indigenous Territories (ITs) and Community Managed Protected Areas (PAs) with less  
27 restriction on forest use than integral PAs may represent cost-effective natural climate solutions  
28 to meet the Paris agreement. However, the literature has been limited to examining the effect of  
29 ITs and Community Managed PAs on deforestation, despite the influence of anthropogenic  
30 degradation. Thus, little is known about the temporal and spatial effect of allocating ITs and  
31 Community Managed PAs on carbon stocks dynamics that account for losses from  
32 deforestation and degradation. Using Amazon Basin countries and Panama at the national  
33 level, and Petén (Guatemala) and Acre (Brazil) at the subnational level, this study aims to  
34 estimate the temporal and spatial effects of ITs and PAs on carbon stocks. To estimate the  
35 temporal effects, we use annual carbon density maps, matching analysis, and linear mixed  
36 models. Furthermore, we explore the spatial biases derived from matching analysis and use  
37 geographic discontinuity designs to assess the spatial effect of PAs and ITs boundaries on  
38 carbon stocks. The temporal effects highlight that allocating ITs preserves carbon stocks and  
39 buffer losses as PAs in Panama and Amazon Basin countries. Community Managed PAs  
40 temporal effect on carbon stocks surpasses that of integral PAs in Petén (Guatemala) and Acre  
41 (Brazil). The geographic discontinuity designs reveal that ITs and Community Managed PAs  
42 boundaries secure more extensive carbon stocks than their surroundings, and this difference  
43 tends to increase towards the least accessible areas. These results also suggest that  
44 indigenous and community land-use in neotropical forests may have a limited and stable spatial  
45 impact on carbon stocks. Our findings imply that ITs and Community Managed PAs in  
46 neotropical forests support Nationally Determined Contributions (NDCs) under the Paris  
47 Agreement. Thus, Indigenous peoples and local communities must become recipients of  
48 countries' results-based payments.

49

50

## 51 Introduction

52 Avoided forest conversion and natural forest management are among the most cost-effective  
53 natural climate solutions to meet the Paris Agreement (1). Protected Areas (PAs), cornerstones  
54 of biodiversity conservation, may contribute to these cost-effective solutions by preventing  
55 carbon stocks losses (2). However, since 1990, South America and Central America have  
56 tripled the area of PAs (3) while simultaneously losing 10% and 25% of forest cover,  
57 respectively (4). These forest conversion trends stress the need for additional natural climate  
58 solutions that could reinforce the role of PAs. In Neotropical countries and across the globe,  
59 Indigenous Territories (ITs) cover significant portions of natural lands with minimal human  
60 disturbance and tend to overlap with PAs (5). More than 30% of the Amazon Basin forest's  
61 aboveground carbon stocks are in ITs, and nearly 7% of these stocks are in areas overlapping  
62 with PAs (Overlapped Areas, hereafter OAs) (6). Other locations with shared governance, such  
63 as Community Managed PAs, also seem promising in climate change mitigation (7). Thus, ITs  
64 and Community Managed PAs with fewer forest use restrictions and non-centralized  
65 governance may conserve forests and potentially represent effective natural climate solutions.

66

67 However, the effect of ITs and PAs in forest conservation might be overestimated based on the  
68 fact that they tend to be located in higher elevations, steeper slopes, and greater distances to  
69 roads and cities than unprotected lands (8,9). To control for this non-random spatial location, an  
70 increasing number of studies have relied on a statistical technique called matching analysis  
71 (10,11). In these studies, matching analysis samples observations with similar geographical  
72 characteristics, removing heterogeneous observations, and allowing to compare protected lands  
73 with unprotected areas. For example, using matching analysis, ITs in the Brazilian Amazon

74 have been found to restrain high deforestation pressure more effectively than PAs (12).  
75 Panama's PAs and claimed ITs more effectively avoided deforestation than unprotected lands  
76 with similar topography and accessibility (13). Matching analysis also allowed identifying  
77 decreased deforestation where ITs and other land tenures overlap (e.g., PAs) in Peru  
78 (Anderson et al., 2018). Furthermore, Blackman & Veit (2018) concluded that ITs in the Amazon  
79 Basin of Colombia, Bolivia and Brazil avoid carbon emissions from deforestation. Similarly,  
80 Community Managed PAs, such as community concessions in Petén (Guatemala), and  
81 sustainable use areas in Acre (Brazil), have been estimated to avoid deforestation, in contrast to  
82 integral PAs that restrict sustainable use, which did not show a discernible effect relative to  
83 unprotected lands (16,17). Therefore, controlling for spatial location using matching confirm that  
84 ITs and Community Managed PAs are as effective as other PAs to avoid deforestation.

85  
86 Despite the influence of anthropogenic degradation and recovery on forest conservation and  
87 carbon stocks dynamics, research on matching analysis has been limited to examining the  
88 effect of protected lands on deforestation. Shifting cultivation, considered a driver of degradation  
89 (18), is common among tropical forest landholders (19). After long fallow periods (>20 years),  
90 shifting cultivation can only recover around 50% of mature forests' carbon stocks (20). Logging  
91 and fires, other causes of degradation in tropical forests, remove 45% and 22% of forest's  
92 carbon stocks and take decades to recover (21). Thus, accounting for forest degradation and  
93 recovery in temporal carbon stocks dynamics may influence the effectiveness of protected lands  
94 in forest conservation, particularly in those with fewer use restrictions (e.g., ITs and Community  
95 Managed PAs). However, little is known about the temporal effect of protected lands on carbon  
96 stocks dynamics after controlling for spatial location.

97  
98 Matching analysis controls for the spatial location, but it does not guarantee unambiguous  
99 estimates of protected lands' effects in forest conservation. Karsenty et al. (22) highlight that

100 matching analysis implies weighting influence to particular deforestation (or degradation)  
101 covariates, such as roads or rivers. The choice and omission of covariates influence the  
102 observations sampled by matching, potentially excluding relevant areas, and altering the effect  
103 attributed to a particular protected land (22). In this regard, some have recognized that sampling  
104 through matching analysis might not be independent and exclude observations around the  
105 boundaries of protected lands (23–25), rather than exploring the implications of sampling across  
106 these boundaries. Conversely, the effect of protected lands' boundaries on deforestation has  
107 been estimated through regression discontinuity designs. Bonilla-Mejía & Higuera-Mendieta (26)  
108 found that ITs' boundaries are more effective than integral PAs at curbing deforestation in  
109 Colombia. Similarly, Baragwanath & Bayi (27) established that ITs' boundaries with granted  
110 property rights in Brazil decrease deforestation. However, few studies have used matching  
111 analysis in geographic discontinuity designs, control for geographic distance among  
112 observations (28), and estimate the effect of protected lands' boundaries on carbon stocks. Nor  
113 have they addressed whether different forest use levels, such as ITs and PAs, imply different  
114 spatial effects on carbon stocks.

115  
116 This study builds upon previous research assessing the effect of protected lands on  
117 deforestation through matching analysis and addresses some limitations of this methodology.  
118 Using Panama and Amazon Basin Countries at the national scale, and Petén (Guatemala) and  
119 Acre (Brazil) at the subnational scale, this study aims to estimate protected lands' temporal and  
120 spatial effects on aboveground carbon stocks. The hypothesis is that protected lands with more  
121 restrictions on forest use (e.g., PAs) will secure higher carbon stocks than less restrictive lands  
122 (e.g., ITs and Community Managed PAs) over time and throughout their boundaries by reducing  
123 the influence of anthropogenic degradation. Regardless of forest use restrictions and  
124 governance, we find that protected lands preserve carbon stocks and buffer losses temporarily  
125 and spatially across neotropical forests.

126 Our study makes three contributions to the literature. First, we provide a consistent use of  
127 matching analysis in multiple protected lands and countries, allowing us to compare the effects  
128 of ITs, OAs, and PAs across Central America and the Amazon Basin. Conversely, previous  
129 studies have analyzed either multiple protected lands on a country scale (e.g., 14,17,18) or  
130 single protected lands categories across regions (e.g., 11,16). Second, we use the temporal  
131 dynamics of aboveground carbon stocks (2003 to 2016) instead of forest cover, thus making it  
132 possible to estimate a more accurate temporal effect of protected lands in climate change  
133 mitigation. Furthermore, we explore the spatial biases derived from matching analysis sampling  
134 and account for them through geographic discontinuity designs, allowing us to assess the  
135 spatial effect of protected lands' boundaries on carbon stocks. To our knowledge, this study is  
136 among the first to estimate the effect of multiple protected lands on carbon stocks temporarily  
137 (14 years) and spatially (throughout boundaries), providing a quantified estimate of forest  
138 conservation and climate change mitigation across Neotropical Forests.

139

## 140 Methods

### 141 Geographic scope

142 This study emerged from the annual meeting of the "Red Amazónica de Información  
143 Socioambiental Georeferenciada" RAISG (Amazon Georeferenced Socio-Environmental  
144 Information Network) carried out in Quito (Ecuador) in August 2018. The authors belong to  
145 diverse organizations (Academic, Research, International and National NGOs) that participate  
146 or collaborate with RAISG. Additionally, some of the authors have also previously collaborated  
147 with the "Coordinadora de las Organizaciones Indígenas de la Cuenca Amazónica" - COICA  
148 (Coordinator of Indigenous Organizations of the Amazon River Basin), and the "Alianza  
149 Mesoamericana de Pueblos y Bosques" - AMPB (Mesoamerican Alliance of Peoples and

150 Forests). These authors' collaborations and the aim to provide indigenous peoples,  
151 communities, and countries with a quantified estimate of their forest conservation activities  
152 define our study's geographical scope: the Department of Petén (Guatemala), Panama, and the  
153 Amazon Basin portions from Colombia, Ecuador, Peru, and Brazil. The study sites cover an  
154 area surpassing 10,000 million ha and contain a mosaic of protected lands that include PAs and  
155 ITs.

156

157 Our study has two scales of analysis: the country-level and the subnational-level. The country-  
158 level analysis includes Panama and Amazon Basin Countries (Fig 1). PAs at the country-level  
159 encompass national and sub-national jurisdictions with governance by governments, private  
160 governance, and shared governance that allow sustainable use from privates and communities  
161 (Table 1). ITs without official titles or in the process of official recognition (i.e., claimed lands)  
162 were also included at the country-level, except in Colombia, where the data was not available.  
163 All ITs overlapping with PAs were defined as OAs. To capture the influence of different  
164 governance categories of PAs, we analyzed at the subnational-level two case studies (Fig 2):  
165 the Maya Biosphere Reserve in the Department of Petén (Guatemala) and the State of Acre  
166 (Brazil). PAs were classified into three governance categories (Table 2): Community Managed  
167 PAs, Sustainable Use PAs, and Integral PAs. Community Managed PAs corresponded to  
168 Community Concessions from Petén (Guatemala) and Extractive Reserves from Acre (Brazil),  
169 where local communities share forests' governance with governments. Sustainable Use PAs are  
170 equivalent to IUCN Categories IV, V and VI areas that share governance with governments but  
171 do not exclusively involve community management. Finally, Integral PAs corresponded to  
172 National Parks with a limited human presence and emphasize on biodiversity conservation  
173 equivalent to IUCN I-III. All private and public lands outside ITs, OAs and PAs were defined as  
174 other lands in the national and subnational level analyses.

175

176 **Fig 1. National-level analysis.** Panama and the Amazon Basin portions of Colombia, Ecuador,  
 177 Peru, and Brazil. Land tenure is classified as PAs (green), ITs (orange), OAs (yellow), and  
 178 Other Land (grey).  
 179

| National Jurisdiction | Protected Lands                                                                                                                                                                      |                                                                                                 |
|-----------------------|--------------------------------------------------------------------------------------------------------------------------------------------------------------------------------------|-------------------------------------------------------------------------------------------------|
|                       | Protected Areas (PAs)                                                                                                                                                                | Indigenous Territories (ITs)                                                                    |
| Panama                | National Park<br>Protective Forest<br>Wildlife Refugee<br>Multiple Use Area<br>Forest Reserve<br>Hydrological Reserve<br>Zone of hydrological protection                             | Titled: "Comarcas"<br>Titled: Collective Territories<br>Claimed/Untitlled                       |
| Colombia              | National Park<br>National Protective Forest Reserve<br>National Forest Reserve<br>Civil Society Nature Reserve<br>Fauna and Flora Sanctuary                                          | Titled: Indigenous Reserve                                                                      |
| Ecuador               | National Park<br>National Reserve<br>Protective Forests<br>Ecological Conservation Area<br>Biological Reserve<br>Ecological Reserve<br>Fauna Production Reserve<br>Wildlife Refugees | Titled<br>Declared<br>Claimed/Untitlled                                                         |
| Peru                  | National Park<br>National Sanctuary<br>Historical Sanctuary<br>Protective Forest<br>Landscape Reserve<br>Communal Reserve<br>Hunting Reserve<br>Reserved Zone                        | Titled / Declared: Native community<br>Titled/ Declared: Peasant community<br>Claimed/Untitlled |



|        |                                      |                                         |
|--------|--------------------------------------|-----------------------------------------|
| Brazil | National Park                        | Titled/ Declared: Indigenous Area       |
|        | Environmental Protection Area        | Titled/ Declared: Native Community      |
|        | Area of Relevant Ecological Interest | Titled / Declared: Indigenous Reserve   |
|        | Ecological Station                   | Titled / Declared: Indigenous Territory |
|        | State Forest                         | Claimed/Untitlled                       |
|        | State Park                           |                                         |
|        | Wildlife Refugee                     |                                         |
|        | Biological Reserve                   |                                         |
|        | Sustainable Use Reserve              |                                         |
|        | Extractive Reserve                   |                                         |

180 **Table 1. Protected lands included at the national-level analysis.** PAs are equivalent to IUCN  
181 categories I-VI. All areas in which ITs overlap with PAs are considered Overlapped Areas  
182 (OAs).

183  
184 **Fig 2. Subnational-level analysis.** (A) The department of Petén in Guatemala and the state of  
185 Acre in the Brazilian Amazon. Protected Areas (PAs) in Petén (Guatemala) (B) and Acre (Brazil)  
186 (C). PAs are classified into different governance categories: Community Managed PAs (light  
187 green), Sustainable Use PAs (blue-green) and Integral PAs (dark green). Other PAs (white) in  
188 Petén correspond to buffer zones and multiple-use areas. Protected Lands (Excluded) (black  
189 lines) were not analyzed and correspond to PAs outside the Maya Biosphere Reserve in Petén  
190 (Guatemala), and ITs in Acre (Brazil).

191  
192

193

194

195

### Protected Areas (PAs)

| <b>Subnational Jurisdiction</b> | Community Managed     | Sustainable Use                      | Integral                              |
|---------------------------------|-----------------------|--------------------------------------|---------------------------------------|
| Peten (Guatemala)               | Community Concessions | Private Concessions and Cooperatives | National Parks<br>Protected Biotopes  |
| Acre (Brazil)                   | Extractive Reserves   | National Forests                     | National Parks<br>Ecological Stations |

196 **Table 2. PAs included at the Subnational-level analysis.** PAs classified into different  
197 governance categories in Petén (Guatemala) and Acre (Brazil).

198

## 199 Spatial data and processing

200 The boundaries of protected lands were curated by ACOFOP (Asociación de Comunidades  
201 Forestales de Petén) for Petén (Guatemala); the Neotropical Ecology Laboratory (McGill  
202 University, Smithsonian Tropical Research Institute) for Panama; and RAISG (Amazon Geo-  
203 referenced Socio-Environmental Information Network) in the case of Amazon Basin Countries.

204

205 We used Annual carbon density maps based on raster data (~500 m resolution) that was  
206 generated by the Woodwell Climate Research Centre between 2003 and 2016 and explained in  
207 detail by Baccini et al. (29,30) and Walker et al. (6). These estimations derive from combining  
208 LiDAR data and field measurements that calibrate a machine learning algorithm that generates  
209 annual carbon density estimates from MODIS satellite imagery. These carbon density maps can  
210 detect annual losses and gains in carbon density, aggregating changes from deforestation,  
211 forest degradation, and recovery.

212

213 Elevation, slope and the distance to roads, settlements and rivers were included as covariates  
214 to establish the spatial location conditions associated with annual carbon density across

215 national and subnational jurisdictions (S1 Appendix). Elevation and slope were obtained from  
216 the satellite imagery of the SRTM (Shuttle Radar Topographic Mission - Arc Second Global).  
217 The distance to roads was calculated from geospatial data produced by national institutions in  
218 Petén and Panama (S1 Appendix). Road distance corresponding to Amazon Basin countries  
219 was based on the geospatial data curated by RAISG. The distances to rivers and settlements (>  
220 5000 people) were calculated from geospatial data produced by national institutions. Land  
221 tenure and covariate data were resampled to the spatial resolution of carbon density, creating  
222 observation units of ~500-m resolution across different land tenures with estimates for  
223 covariates and carbon density. All geoprocessing was performed in ArcGIS (ESRI, 2018).  
224 Finally, we established protected lands' non-random spatial location by estimating the mean  
225 covariate differences between other lands and protected lands in each jurisdiction using Mann  
226 Whitney tests (S2 Appendix).

227

## 228 Coarsened exact matching

229 We performed matching analysis and linear mixed models to control for spatial location and  
230 infer the effect of PAs, ITs and OAs (i.e., protected lands) on carbon stocks relative to other  
231 lands (Fig 3). Matching analysis preprocesses datasets to reduce the association of a treatment  
232 variable with covariates by removing heterogeneous observations and creating a subset of  
233 treatment and control observation units with similar covariate values (31). Here, the treatment  
234 variable corresponded to land tenure, and matching created subsets of observation units of  
235 ~500 m resolution in protected lands and other lands with similar slope, elevation and distance  
236 to roads, towns and rivers. To account for the size and heterogeneity of the Brazilian Amazon,  
237 we included the states as covariates in this country.

238

239 **Fig 3. Workflow to infer the temporal and spatial effect of ITs, OAs, and PAs on carbon**  
240 **stocks.**

241  
242 Specifically, we used coarsened exact matching (CEM) (32) with the R package *MatchIt* (33) for  
243 each protected land across the national and subnational levels analyses. Following steps from  
244 Iacus et al. (34), we first defined coarsening choices for each covariate (S3 Appendix). For  
245 example, the elevation was coarsened in multiple categories based on 100 meters intervals.  
246 This coarsening choice meant that protected lands and other lands with elevation values  
247 between 900 and 1000 m were considered "equivalent". Then, CEM located control and  
248 treatment observation units in matching sub-groups with equivalent coarsened values for all  
249 covariates. The third step pruned matching sub-groups that did not have at least one treatment  
250 and one control observation with equivalent coarsened covariate values. These steps were  
251 reiterative until the coarsening choices produced standardized mean differences between  
252 protected lands and other lands below 5% for all covariates (S4 Appendix).

253  
254 After isolating the effect of spatial location through matching, we made temporal estimates  
255 regarding the effect of allocating protected lands on carbon stocks at national and subnational  
256 levels. This effect was calculated using linear mixed models in the R package *lme4* (35). Annual  
257 carbon density was the outcome variable, and land tenure (protected land or other land) a fixed  
258 effect. Additionally, elevation, slope and the distance to roads, towns, and rivers were also  
259 defined as fixed effects, spanning any remaining imbalances from the matched subsets. The  
260 matched sub-group (matched observation units between protected lands and other lands with  
261 similar covariate values) was a random effect to account for the structure of matched subsets.  
262 These linear mixed models were estimated annually between 2003 and 2016 in all study sites,  
263 for each protected land category separately. Two parameters derived from the linear mixed  
264 models were used to determine the effect of protected lands on carbon stocks after controlling

265 for spatial location: the intercept and land tenure. The intercept or the annual carbon density  
266 found in other lands represents the carbon stocks baseline for protected lands. The land  
267 tenure's effect refers to the annual average differences of carbon stocks between protected  
268 lands and other lands after matching, defined as the temporal effect.

269

## 270 Geographic discontinuity designs

271 After calculating the distance of matched observation units around the boundaries of protected  
272 lands, we explored geographic discontinuity designs to estimate the spatial effect of  
273 administrative boundaries (36). Specifically, we assessed how protected lands' boundaries  
274 influence carbon stocks compared with other neighbouring lands. Our geographic discontinuity  
275 designs followed Keele et al. (28), which uses matching methods to find treatment and control  
276 observation units with similar covariates, including the geographic distance between observation  
277 units. To implement these designs, we created subsets of observation units with buffer zones  
278 inside and outside of protected lands boundaries, of 0–1 km, 0–5 km, 0–10 km, and 0–15 km.  
279 The boundaries between protected lands (e.g., ITs and PAs) were not tested except in Petén  
280 (Guatemala). Some protected lands in the Maya Biosphere Reserve (Petén, Guatemala), such  
281 as community concessions (Community Managed PAs) and National Parks (Integral PAs), do  
282 not share boundaries with other lands. Therefore, the geographic discontinuity designs in Petén  
283 (Guatemala) compared the boundaries of Community Managed PAs with Integral PAs,  
284 Sustainable Use PAs, and Other protected lands (i.e., buffer zones and multiples use zones).

285

286 After defining the geographic discontinuity designs, we also performed CEM with the buffer  
287 zones subsets, including slope, elevation and distance to roads, towns and rivers as covariates.  
288 Additionally, we controlled for the geographic distance among observation units according to  
289 buffer zones. For example, for buffer zones 0–1 km, we included matches across a 2-km radius,

290 and for 0–15-km buffer zones, a 30-km radius. The differences between average carbon stocks  
291 stored inside and outside the boundaries of protected lands, or the spatial effect, was also  
292 estimated through the linear mixed models aforementioned. The geographic discontinuity  
293 designs estimated the effect of protected lands' boundaries on carbon stocks in 2003 and 2016.  
294

## 295 Results

### 296 The temporal effect of protected lands on carbon stocks across 297 neotropical countries

298 Matching analysis controlled the influence of spatial location, allowing to estimate the temporal  
299 effect of allocating protected lands on carbon stocks. This temporal effect represents the annual  
300 mean difference of carbon stocks between protected lands and other lands (Fig 4). Across  
301 Panama and Amazon Basin countries, the carbon stocks from 2003 to 2016 in protected lands  
302 were usually higher than other lands (i.e. the baseline), resulting in positive temporal effects.  
303 Country-level comparisons of temporal effects reveal three regional patterns. Protected lands in  
304 Panama had low carbon stocks baselines in other lands (< 65 t C/ha) and substantial temporal  
305 effects that represented an increase in carbon stocks above 30%. Brazil's protected lands  
306 displayed moderate baselines (< 115 t C/ha) and temporal effects (< 18%). The carbon stocks  
307 baselines in western Amazon Basin countries exceeded those of Brazil (> 115 t C/ha), while the  
308 temporal effects were moderate (< 10%). Hence, the temporal effects seem substantial in  
309 countries with reduced carbon stocks in other lands.

310

311 **Fig 4. The temporal effects of protected lands on aboveground carbon stocks across**  
312 **neotropical countries in 2003 and 2016.** Significant temporal effects ( $p < 0.05$ ) are  
313 represented as colored bars and percentages, indicating the additional/fewer carbon stocks

314 secured by allocating ITs (orange), OAs (yellow), and PAs (green) relative to the baseline  
315 (Other Lands, grey) after controlling for spatial location. Error bars reflect 95% confidence  
316 intervals for the baselines and temporal effects.

317  
318 The positive temporal effects also reveal the additional amount of carbon stocks secured by  
319 allocating protected lands in a particular year across Panama and Amazon Basin countries  
320 (Figure 4). During 2003, PAs in Panama secured 95% (37 t C/ha) larger carbon stocks than  
321 their baseline (39 t C/ha). Relative to more substantial baselines ( $> 55$  t C/ha), Panama's IT's  
322 and OA's accounted for 35% (19 t C/ha) and 71% (44 t C/ha) additional carbon stocks. Similar  
323 to Panama, protected lands in Amazon Basin countries represented positive temporal effects in  
324 2003. Brazil's ITs and PAs represented 6% ( $\sim 6$  t C/ha, respectively) additional carbon stocks  
325 compared to their baselines ( $\sim 105$  t C/ha), and this effect nearly doubled in OAs (12%, 14 t  
326 C/ha). Western Amazon Basin countries displayed similar temporal effects in 2003, ranging  
327 between 5–5.7% (i.e., 5 - 7 t C/ha) in PAs from Peru and Colombia, 3.5–5.7 % (i.e., 5 - 7 t C/ha)  
328 in PAs from the same countries, and 0.7– 4 % (i.e., 0.5 - 5 t C/ha) in OAs from Colombia and  
329 Ecuador. Despite regional differences, these results suggest that in 2003 OAs and ITs had a  
330 similar effect on carbon stocks compared to PAs in neotropical countries.

331  
332 Overall, protected lands' temporal effects on carbon stocks remained stable or increased  
333 relative to other lands until 2016 (Fig 4, S5 Appendix). These effects remained stable in PAs  
334 and ITs from Ecuador and did not vary more than 0.5%. ITs in other Amazon Basin countries  
335 exhibited increases in temporal effects, reaching between  $\sim 3\%$  (4 t C/ha) in Peru and  $\sim 10\%$  (10  
336 t C/ha) in Brazil. Similarly, Amazon basin PAs had increases that resulted in temporal effects  
337 between  $\sim 4\%$  ( $\sim 11$  t C/ha) and  $\sim 9.1\%$  (9.5 t C/ha) for Peru and Colombia, respectively. The  
338 temporal effects considerably varied in Amazon Basin OAs during 2016, showing no differences  
339 with the baseline in Colombia and the largest increase in Brazil (17.2%, 19 t C/ha). Conversely,

340 protected lands in Panama experienced decreases in temporal effects ( $> -5\%$ ) that seem to be  
341 driven by the recovery of carbon stocks in other lands (S6 Appendix). Thus, stable and  
342 increasing temporal effects reflect that allocating protected lands buffered losses and secured  
343 the stability of carbon stocks relative to the other lands. Furthermore, these results reveal that  
344 indigenous lands (ITs and OAs) and PAs secured similar amounts of carbon stocks until 2016.  
345  
346 The subnational-level analysis in Petén (Guatemala) and Acre (Brazil) estimated the temporal  
347 effects on carbon stocks of PAs with varied forest governance and restrictions on forest use (Fig  
348 5, S7 Appendix) relative to other lands (S8 Appendix). Community Managed PAs in Petén  
349 (Guatemala) (i.e., Community Concessions) had carbon stocks  $\sim 60\%$  (28 t C/ha) larger than  
350 other lands (95.5 t C/ha) in 2003, and this effect increased to 78% (34 t C/ha) in 2016. Acre's  
351 Community Managed PAs (i.e., Extractive reserves) also registered in 2003 larger carbon  
352 stocks (6.2%, 8 t C/ha) than other lands (109.4 t C/ha) and an increase in 2016 (9.1%, 11 t  
353 C/ha). These temporal effects of Community Managed areas were always greater than  
354 Sustainable Use PAs in Petén (Guatemala) and Acre (Brazil). Community Managed PAs at  
355 least doubled the temporal effect on carbon stocks of Private Concessions and Cooperatives  
356 (Petén, Guatemala), and National Forests (Acre, Brazil). The differences in temporal effects  
357 were narrower between Integral PAs and Community Managed PAs. During 2016, Integral PAs  
358 exhibited an effect of  $\sim 58\%$  (25t C/ha) in Petén (Guatemala) and  $\sim 7\%$  (10 t C/ha) in Acre  
359 (Brazil). These findings indicate that between 2003 and 2016, Community Managed PAs had a  
360 larger effect on carbon stocks than Sustainable Use PAs and integral PAs and highlight the  
361 variation among PAs at a subnational scale.

362

363

364

365



366 **Fig 5. The temporal effects of PAs in Petén (Guatemala) and Acre (Brazil) on carbon**  
367 **stocks in 2003 and 2016.** Significant temporal effects ( $p < 0.05$ ) are represented as colored  
368 bars and percentages, indicating the additional/fewer carbon stocks secured by allocating  
369 Community Managed PAs (light green), Sustainable Use PAs (cyan), and Integral PAs (dark  
370 green) relative to the Baseline (Other Lands, grey) after controlling for spatial location. Error  
371 bars reflect 95% confidence intervals for the baselines and temporal effects.

372

### 373 **Insight at a finer scale: The role of protected lands' boundaries on** 374 **carbon stocks**

375 To identify the spatial implications of matching analysis in quantifying forest conservation, we  
376 estimated the distance of observation units to the boundaries of protected lands (Fig 6, Table 3).  
377 Matched observation units in protected lands had a range of average distances to their  
378 boundaries, between 1.3 km ( $\pm 2.26$ ) in PAs from Ecuador and 10.15 km ( $\pm 11.70$ ) in PAs from  
379 Peru. The distance of matched observation units in other lands to the boundaries of protected  
380 lands ranged between 3.10 km ( $\pm 3.13$ ) (Ecuador) and 9.52 km ( $\pm 7.72$ ) (Panama). Not  
381 surprisingly, the spatial distributions imply that observations along the boundaries of protected  
382 lands are more likely to share spatial features (i.e., elevation, slope, and distance to roads,  
383 towns, and rivers). In the case of observations in protected lands, these sampling outcome  
384 suggests that matching analysis selects the most accessible areas, omitting the core and  
385 possibly more intact forests. Thus, the spatial distribution from matching indicates that the  
386 aforementioned temporal effects of protected lands are conservative.

387

388 **Figure 3. Observation units sampled through matching analysis in protected lands from**  
389 **Panama and Acre.** (A). Panama is National-level analysis, including PAs, ITs, and OAs. (B).  
390 Acre (Brazil) is a subnational-level analysis and includes different PAs categories.

391

| <b>Jurisdiction</b> | <b>Land Tenure</b>    | <b>Mean distance of Matched Observation Units to Protected Lands' boundaries (km)</b> | <b>SD</b> |
|---------------------|-----------------------|---------------------------------------------------------------------------------------|-----------|
| Panama              | Other Lands           | 9.51                                                                                  | 7.72      |
|                     | PAs                   | 1.04                                                                                  | 1.41      |
|                     | ITs                   | 2.37                                                                                  | 2.99      |
|                     | OAs                   | 2.25                                                                                  | 2.75      |
| Colombia            | Other Lands           | 10.57                                                                                 | 10.70     |
|                     | PAs                   | 6.32                                                                                  | 5.25      |
|                     | ITs                   | 9.35                                                                                  | 1.34      |
|                     | OAs                   | 8.69                                                                                  | 7.55      |
| Ecuador             | Other Lands           | 3.10                                                                                  | 3.13      |
|                     | PAs                   | 1.30                                                                                  | 1.55      |
|                     | ITs                   | 1.39                                                                                  | 2.25      |
|                     | OAs                   | 1.48                                                                                  | 1.80      |
| Peru                | Other Lands           | 6.57                                                                                  | 6.72      |
|                     | PAs                   | 10.15                                                                                 | 11.70     |
|                     | ITs                   | 1.94                                                                                  | 3.24      |
|                     | OAs                   | 6.37                                                                                  | 5.62      |
| Brazil              | Other Lands           | 6.19                                                                                  | 4.26      |
|                     | PAs                   | 6.12                                                                                  | 4.25      |
|                     | ITs                   | 6.11                                                                                  | 4.25      |
|                     | OAs                   | 5.86                                                                                  | 4.20      |
| Peten (Guatemala)   | Other Lands           | 42.19                                                                                 | 29.34     |
|                     | Strict PAs            | 3.70                                                                                  | 2.89      |
|                     | Community Managed PAs | 2.89                                                                                  | 2.35      |
|                     | Sustainable Use PAs   | 4.01                                                                                  | 2.52      |
| Acre (Brazil)       | Other Lands           | 5.81                                                                                  | 10.31     |
|                     | Strict PAs            | 4.72                                                                                  | 4.92      |
|                     | Community Managed PAs | 2.47                                                                                  | 2.99      |
|                     | Sustainable Use PAs   | 1.37                                                                                  | 1.53      |

392

393 **Table 3. Mean distance to protected lands' boundaries of observation units sampled**  
 394 **through matching analysis by jurisdiction and land tenure.**

395

396 Considering the spatial distribution of matched observations, we performed geographic  
397 discontinuity designs to understand how carbon stocks varied spatially throughout the  
398 boundaries of protected lands in 2003 and 2016. The geographic discontinuity designs estimate  
399 spatial effects. That is, the mean differences of carbon stocks inside and outside protected  
400 lands for various distances around their boundaries, after controlling for spatial location. Overall,  
401 the geographic discontinuity designs show that carbon stocks increase inside the boundaries of  
402 protected lands in 2003 and 2016 (Figure 7). As discussed below, the geographic discontinuity  
403 designs reveal spatial and spatial-temporal patterns across protected lands.

404

405 **Figure 7. The spatial effect of protected lands' boundaries on carbon stocks during 2003**  
406 **and 2016 in neotropical countries.** Significant temporal effects ( $p < 0.05$ ) are represented as  
407 points and percentages, indicating the additional/fewer carbon stocks secured inside the  
408 boundaries of ITs (orange), OAs (yellow), and PAs (green) relative to surrounding lands at a  
409 certain buffer distance. Empty points and dashed lines represent the spatial effects in 2003,  
410 while full points and continuous lines the spatial effects in 2016. The values in parentheses  
411 represent the percentual increase/decrease in spatial effects between 2003 and 2016. Error  
412 bars reflect 95% confidence intervals for the temporal effects.

413

414 The spatial patterns of geographic discontinuity designs exhibit how protected lands influence  
415 carbon stocks within their boundaries. We found that the spatial effects of protected lands tend  
416 to increase with the buffer distance to boundaries, and they are more pronounced in the first 5  
417 km (Figure 7, S9 Appendix). For instance, ITs from Brazil in 2016 had carbon stocks 10.3% (21  
418 t C/ha) larger than surrounding areas (102 t C/ha) when comparing a 1 km buffer. This spatial  
419 effect increased to 15% (27 t C/ha) at 5 km, 17% (~30 t C/ha) at 10 km, and 19% (~34 t C/ha) at  
420 15 km. ITs in Panama and western Amazon Basin countries displayed a similar spatial effect.  
421 Except for Peru, OAs also had increasing spatial effects, and their influence on carbon stocks

422 exceeded that of ITs and PAs. For example, OAs' carbon stocks in Colombia did not differ from  
423 surrounding areas at 1km (120 t C/ha) in 2016 but had a spatial effect on carbon stocks of 2.5%  
424 (~7 t C/ha) at 5 km, which is over five times higher than ITs' and PAs' effect in the same country.  
425 The spatial influence of PAs varied across countries. Relative to 10 km buffer comparisons, PAs  
426 spatial effects on carbon stocks reduce at 15 km in Brazil and Peru. At 1 and 5 km buffers,  
427 Colombia's PAs had 0.80% and 0.46% fewer carbon stocks than surrounding lands,  
428 respectively. These resulting spatial patterns imply that allocating ITs and OAs generate  
429 boundaries that effectively conserve carbon stocks as PAs. Furthermore, the increasing effects  
430 on carbon stocks along with the distance to boundaries, more frequent in ITs and OAs, indicate  
431 that protected lands shape forest landscapes by preserving the core and least accessible areas.  
432

433 A spatial-temporal comparison of geographic discontinuities between 2003 and 2016 may  
434 indicate whether the boundaries of protected lands bring stability to carbon stocks. We found  
435 that from 2003 to 2016, the differences of carbon stocks inside and outside protected lands  
436 increased, except for ITs in Colombia (Figure 7). Colombia's ITs secured larger carbon stocks  
437 within their boundaries in 2016, but their spatial effect reduced 0.2% at 5km and 10km,  
438 potentially driven by a recovery in surrounding areas (S9 Appendix). The most substantial  
439 increases in spatial effects occurred among OAs. In Brazil, OAs spatial effect on carbon stocks  
440 increased by 11% (~34 to 53 t C/ha) at 15 km in 2016, while ITs and PAs by 5.4% and 3.7%  
441 respectively. Similarly, Ecuador's OAs increased their spatial effects on carbon stocks 2.2% at  
442 15km, contrasting national PAs (0.6%) and ITs (0.2%). These increases between 2003 and  
443 2016 in spatial effects suggest carbon stocks losses in surrounding areas that were buffered  
444 inside the boundaries of protected lands, especially in OAs.

445  
446 The geographic discontinuity designs in multiple categories of PAs from Acre (Brazil) and Petén  
447 (Guatemala) represent different geographic settings (Figure 8, S10 Appendix). As with country-

448 level results, geographic discontinuities in Acre (Brazil) compared carbon stocks inside and  
449 outside PAs' boundaries. At 5km buffers from their boundaries, Community Managed PAs had  
450 8.4% larger carbon stocks than surrounding lands (126 t C/ha) at 5km from their boundaries in  
451 2016. Acre's Sustainable Use PAs and Integral PAs had a more moderate effect, exhibiting a  
452 7.2% and 5.2% increase of carbon stocks inside their boundaries at the same distance and  
453 during the same year. Moreover, the spatial effects of Community Managed and Sustainable  
454 Use PAs consistently increased with the buffer distance to boundaries, contrasting Integral PAs.  
455 The spatial effects in Acre (Brazil) during 2016 exceeded those of 2003, implying the stability of  
456 carbon stocks within all PA's boundaries and a decrease outside in other lands (S10 Appendix).  
457 Petén (Guatemala) represented another geographic setting where PAs share boundaries inside  
458 the Maya Biosphere Reserve. After comparing the boundaries of Community Managed with  
459 other PAs categories, at 5 km buffers, we found that these areas stored 3% more carbon than  
460 integral PAs, but 0.82% fewer than sustainable use PAs. Compared with 2003, these spatial  
461 effects reduced, partially driven by the recovery of PAs surrounding Community Managed PAs  
462 (S10 Appendix). Despite the different geographic settings of Acre (Brazil) and Peten  
463 (Guatemala), these case studies suggest that the boundaries of Community Managed PAs  
464 secure higher carbon stocks than Integral PAs.

465

466 **Figure 8. The spatial effect of PAs' boundaries on carbon stocks during 2016 in Petén**  
467 **(Guatemala) and Acre (Brazil).** Significant temporal effects ( $p < 0.05$ ) are represented as  
468 points and percentages, indicating the additional/fewer carbon stocks secured inside the  
469 boundaries of Community Managed PAs (light green), Sustainable Use PAs (cyan), and Strict  
470 PAs (dark green) relative to surrounding lands at a certain buffer distance. Empty points and  
471 dashed lines represent the spatial effects in 2003, while full points and continuous lines the  
472 spatial effects in 2016. The values in parentheses represent the percentual increase/decrease  
473 in spatial effects between 2003 and 2016. Error bars reflect 95% confidence intervals for the

474 temporal effects. The spatial effect in the Maya Biosphere Reserve (Petén) compares  
475 Community Managed PAs with other Protected Lands, Sustainable Use PAs, and Integral PAs.  
476 PAs in Acre are compared with Other Lands.

477

## 478 Discussion

479 In this study, we aim to estimate the temporal and spatial effects of allocating protected lands,  
480 namely ITs, PAs and OAs, on carbon stocks across Neotropical Forests from Central America  
481 and the Amazon Basin. Considering that these protected lands presumably experience low  
482 anthropogenic pressures of forest loss, we control the effect of spatial location. Contrary to our  
483 hypothesis, ITs, OAs, and Community Managed PAs generally preserve carbon stocks and  
484 buffer losses as much as other PAs with more forest use restrictions. Over time, these protected  
485 lands secure more stable and higher carbon stocks than other lands between 2003 and 2016.  
486 Spatially, the geographic discontinuity designs show that carbon stocks increase inside the  
487 boundaries of protected lands. These temporal and spatial effects were conservative and had  
488 varied patterns across protected lands and jurisdictions.

489

## 490 The effectiveness of protected lands in conserving forests and 491 carbon stocks

492  
493 Our findings highlight the need for a "spatially explicit" understanding of matching analysis  
494 regarding protected lands and forest conservation. Other studies recognize the spatial biases of  
495 matching analysis and incorporate more "spatially explicit" methodologies. Gaveau et al. (2013),  
496 for example, provides the spatial distribution of matched observation units among timber  
497 concessions, PAs and oil palm concessions in Kalimantan (Indonesia). Bowker et al. (2017) in  
498 Africa and Zhao et al. (24) in China exclude from matching analysis other lands in a 10-km  
499 buffer around PAs. These studies attempt to avoid spatial autocorrelation by controlling

500 sampling distance, while Negret et al. (37), test different post-matching models to control this  
501 bias and assess avoided deforestation in PAs from Colombia. Other studies use regression  
502 discontinuity designs to isolate some effects of spatial location and test the role protected lands'  
503 boundaries (26,27). Our study presents an integrated approach. On the one hand, the temporal  
504 effect resembles matching methods that are not spatially explicit on sampled observation units  
505 (10,15,17,38). After exploring the spatial distribution of matched observation units, our findings  
506 point that they are biased towards geographic boundaries, causing conservative estimates  
507 about protected lands. On the other hand, we use geographic discontinuity designs with  
508 matching analysis to directly control for spatial location and the geographic distance among  
509 observations, generating valid counterfactuals inside and outside protected lands' boundaries  
510 and maintaining conservative estimates (28). Hence, our study makes a novel methodological  
511 contribution to research by integrating matching analysis and geographic discontinuity designs  
512 to test the effectiveness of PAs' and ITs' boundaries in conserving carbon stocks across  
513 neotropical countries.

514

515 By using conservative estimates, our findings support growing evidence indicating that ITs and  
516 Community Managed PAs can be as effective as other PAs in forest conservation (6,16,39,40).  
517 After controlling for spatial location, we found that allocating indigenous lands (i.e., ITs and OAs)  
518 secured similar or even larger carbon stocks than PAs between 2003 and 2016 in Panama and  
519 Amazon Basin countries. These findings are in line with Nolte et al. (12), who showed that  
520 indigenous lands (ITs and OAs) are more effective than PAs at curbing deforestation pressure  
521 in Brazil. By comparing indigenous lands (ITs and OAs) and PAs, our findings complement  
522 Blackman & Veit's (15) estimates of avoided emissions from deforestation in ITs from Colombia  
523 and Brazil (15). However, they did not detect a discernible effect from Ecuador's ITs, while our  
524 results estimated a positive effect on carbon stocks. Similarly, our results from Panama, where  
525 OAs had the most considerable effect on carbon stocks, partially contrast another study where

526 PAs were the most effective in avoiding deforestation (13). These differences with previous  
527 studies might be attributable to our outcome variable (annual carbon stocks) that integrates  
528 deforestation, degradation, and recovery. Estimating carbon stocks changes offer more  
529 accurate estimates regarding the effectiveness of protected lands, especially in countries where  
530 degradation emissions equal or exceed those from deforestation (e.g., Colombia, Ecuador, and  
531 Peru) (6). Thus, our results demonstrate that indigenous governance or shared governance of  
532 forests is as effective as state-based governance in conserving carbon stocks, suggesting that  
533 titling ITs and formalizing shared governance in PAs represent a significant impact for avoided  
534 land-use emissions in neotropical countries.

535

536 Similarly, Community Managed PAs, here, Community Concessions (Petén, Guatemala) and  
537 Extractive Reserves (Acre, Brazil), were more effective in conserving carbon stocks than other  
538 PAs with sustainable use and strict protection between 2003 and 2016. Regarding the  
539 effectiveness of Community Concessions over Integral PAs, our results are consistent with  
540 Blackman's (16) estimates of avoided deforestation. Additionally, we established that  
541 Community Concessions are more effective than Private Concessions and Cooperatives in  
542 preserving carbon stocks between 2003 and 2016. Other studies also established that PAs with  
543 sustainable use in Acre (Brazil) significantly reduce deforestation (17). According to our results,  
544 the greatest impact in avoiding the loss of carbon stocks is found in Extractive Reserves, while  
545 the impact of National Forests was marginal. Hence, our results indicate that Community  
546 Managed PAs, as ITs and OAs, actively avoid the loss of carbon stocks and bring stability to  
547 forests. Moreover, our results imply that allocating Community Managed PAs, ITs, and OAs,  
548 while providing material and cultural benefits to their inhabitants, can have a pivotal role in  
549 climate change mitigation as other PAs.

550



551 Our geographic discontinuity designs provide conservative estimates regarding protected land's  
552 effect on carbon stocks within their boundaries. Although the assessments of PA's boundaries is  
553 common in the literature (41), they do not control for spatial location or compare different  
554 categories protected lands. Overall, our findings indicate that carbon stocks increase inside the  
555 boundaries of protected lands. However, the spatial effects are variable among PAs. For  
556 example, PAs from Colombia seem only to avoid carbon stock losses more than 5 km inside  
557 their boundaries in 2003 and 2016. These spatial patterns are not due to recent anthropogenic  
558 pressures and confirm the inability of PAs' to reduce forest loss inside their boundaries  
559 (26,42,43). Conversely, our results show that ITs, OAs, and Community Managed PAs tend to  
560 secure larger carbon stocks than their surroundings, and this difference tends to increase  
561 towards the least accessible areas. Similar results were found in ITs with granted property rights  
562 in Brazil (27) and titled IT's in Colombia (26) which gradually decrease deforestation inside their  
563 boundaries. These gradual reductions in deforestation and degradation imply that indigenous  
564 and community land use, presumably for local livelihoods, reduce carbon stocks in the most  
565 accessible forests while conserving core areas. Other studies have shown on a local scale the  
566 limited impacts of indigenous land use, such as shifting agriculture and agroforestry, on carbon  
567 stocks (44,45). Additionally, our results reveal that these spatial effect of protected lands  
568 remains temporarily stable. Case studies from Mexico and Ecuador suggest that land-use is  
569 temporarily stable in ITs (46,47). Our results, after controlling for spatial location, are among the  
570 first to establish that indigenous and community land-use in neotropical forests may have a  
571 limited and stable spatial impact on carbon stocks.

572

## 573 National contexts matter

574

575 Nonetheless, the current and future effects of allocating protected lands on carbon stocks is  
576 influenced by national contexts. Overall geographical trends indicate that protected lands in

577 Panama and Brazil have wider temporal and spatial effects on carbon stocks than Colombia,  
578 Ecuador and Peru. These geographical differences reflect past trends of extensive forest loss in  
579 other lands from Panama (48) and the Brazil (49). Moreover, the increasing differences in  
580 carbon stocks among protected lands and other lands that we found even after controlling for  
581 spatial location, highlight a growing pressure on neotropical forests. Consequently, the  
582 capacity of protected lands to preserve or reduce carbon stock losses is likely to change.  
583 Between 2000 and 2013, tropical South America and Guatemala lost 7.3% and 13% of intact  
584 forest lands, respectively, mostly caused by the expansion of agriculture (50). Community  
585 Concessions in Petén (Guatemala) are challenged by changing concession statuses and land  
586 invasions (7). PAs in Colombia are witnessing an increase in deforestation around their  
587 boundaries after the Peace Agreement with the Revolutionary Armed Forces (FARC) (43). ITs  
588 and PAs in southern Peru are threatened by growing road infrastructure, land invasions, illegal  
589 gold mining, and coca production (51). Oil blocks in the Ecuadorian Amazon will expand in  
590 cover from 32% to 68%, overlapping with biodiversity hotspots in PAs and ITs (52). In Brazil,  
591 limited law enforcement to prevent forest loss from soy, meat, and timber production in the  
592 Amazon Basin converge with recent setbacks in the land tenure security of ITs (53). Land  
593 invasions and deforestation in Panama also pose a threat to ITs (54). In this sense, as  
594 deforestation and degradation persist, countries' climate benefits from forests are increasingly  
595 dependent on the stability of ITs and PAs carbon stocks. The increasing dependence on stable  
596 forests points to the need to protect them through land use planning and resource allocation in  
597 institutions at the international, national, and sub-national level (55,56).

598

599 Finally, our study has some limitations. Regarding covariates of spatial location, the data  
600 included in our analysis do not capture the influence of rapidly changing roads. Nevertheless,  
601 the covariates included in this study still create a general classification of accessibility and forest  
602 loss pressures to control for the non-random location of protected lands. Despite using a

603 stratified sampling matching, known to effectively reduce covariate imbalances and the  
604 variability of treatment effects (e.g., temporal and spatial effects) (57), further research would  
605 benefit from comparing stratified and random sampling matching. We also aimed to identify the  
606 overall influence of protected land categories, but they may represent different realities in each  
607 country. For instance, OAs in Colombia are subject to a policy that requires National Park  
608 Authorities to establish co-management agreements with Indigenous communities (58), which is  
609 not necessarily the case in other countries. Even in our sub-national case study in Petén  
610 (Guatemala), Community Concessions represent a diverse mosaic of community-based  
611 organizations with particular land-use dynamics (16,59). The outcome variable also brings  
612 limitations because it does not differentiate carbon stock losses due to deforestation and  
613 degradation, rather it provides a comprehensive measure (i.e., aboveground carbon stocks) that  
614 captures the effectiveness of protected lands beyond deforestation.

615

## 616 Conclusions

617 After controlling the influence of spatial location, we found that protected lands with fewer  
618 restrictions on forest use represent effective natural climate solutions. Particularly, indigenous  
619 lands (ITs, OAs) and PAs have similar temporal and spatial effects on carbon stocks in Panama  
620 and Amazon Basin countries. A similar effect also emerges when comparing Community  
621 Concessions in Petén (Guatemala) and Extractive Reserves in Acre (Brazil) with Integral PAs.  
622 Considering that the observation units sampled by matching are located along the boundaries of  
623 protected lands, these temporal and spatial effects are conservative. Consequently, our findings  
624 show that indigenous peoples and local communities are supporting Nationally Determined  
625 Contributions (NDCs) under the Paris Agreement. Brazil and Ecuador expect to receive their  
626 first results-based payments from the Green Climate Fund corresponding to 96.5 and 18.6  
627 million USD, respectively (60). For the critical role they play in reducing net carbon emissions,

628 indigenous peoples and local communities must become recipients of such benefits,  
629 independent of the opportunity costs of avoided deforestation and degradation (61).  
630

## 631 Acknowledgements

632 For valuable comments and suggestions, we thank Divya Sharma, Paola Fajardo, Chris  
633 Madsen, and Matthieu Guillemette. Data analysis and storage was enabled in part by support  
634 provided by Calcul Québec ([www.calculquebec.ca](http://www.calculquebec.ca)) and Compute Canada  
635 ([www.compute canada.ca](http://www.compute canada.ca)). We are grateful to the Environmental Defense Fund for their  
636 financial support.

## 637 References

- 638 1. Griscom BW, Adams J, Ellis PW, Houghton RA, Lomax G, Miteva DA, et al. Natural  
639 climate solutions. *Proc Natl Acad Sci* [Internet]. 2017;114(44):11645–50. Available from:  
640 <http://www.pnas.org/lookup/doi/10.1073/pnas.1710465114>
- 641 2. MacKinnon K, Dudley N, Sandwith T. Natural solutions: protected areas helping people to  
642 cope with climate change. *Oryx* [Internet]. 2011 Oct 8;45(4):461–2. Available from:  
643 [https://www.cambridge.org/core/product/identifier/S0030605311001608/type/journal\\_artic  
644 le](https://www.cambridge.org/core/product/identifier/S0030605311001608/type/journal_article)
- 645 3. Morales-Hidalgo D, Oswalt SN, Somanathan E. Status and trends in global primary  
646 forest, protected areas, and areas designated for conservation of biodiversity from the  
647 Global Forest Resources Assessment 2015. *For Ecol Manage*. 2015;352:68–77.
- 648 4. Keenan RJ, Reams GA, Achard F, de Freitas J V., Grainger A, Lindquist E. Dynamics of  
649 global forest area: Results from the FAO Global Forest Resources Assessment 2015. *For  
650 Ecol Manage*. 2015;352:9–20.

- 651 5. Garnett ST, Burgess ND, Fa JE, Fernández-Llamazares Á, Molnár Z, Robinson CJ, et al.  
652 A spatial overview of the global importance of Indigenous lands for conservation. *Nat*  
653 *Sustain* [Internet]. 2018;1(7):369–74. Available from: [http://dx.doi.org/10.1038/s41893-](http://dx.doi.org/10.1038/s41893-018-0100-6)  
654 018-0100-6
- 655 6. Walker WS, Gorelik SR, Baccini A, Aragon-Osejo JL, Josse C, Meyer C, et al. The role of  
656 forest conversion, degradation, and disturbance in the carbon dynamics of Amazon  
657 indigenous territories and protected areas. *Proc Natl Acad Sci* [Internet]. 2020 Feb  
658 11;117(6):3015–25. Available from:  
659 <http://www.pnas.org/lookup/doi/10.1073/pnas.1913321117>
- 660 7. Hodgdon BD, Hayward J, Samayoa O. Putting the plus first: Community forest enterprise  
661 as the platform for REDD+ in the Maya biosphere reserve, Guatemala. *Trop Conserv Sci*.  
662 2013;6(3):365–83.
- 663 8. Joppa LN, Pfaff A. High and far: Biases in the location of protected areas. *PLoS One*.  
664 2009;4(12):1–6.
- 665 9. Joppa LN, Pfaff A. Reassessing the forest impacts of protection: The challenge of  
666 nonrandom location and a corrective method. *Ann N Y Acad Sci*. 2010;1185:135–49.
- 667 10. Nelson A, Chomitz KM. Effectiveness of strict vs. multiple use protected areas in reducing  
668 tropical forest fires: A global analysis using matching methods. *PLoS One*. 2011;6(8).
- 669 11. Andam KS, Ferraro PJ, Pfaff A, Sanchez-Azofeifa GA, Robalino JA. Measuring the  
670 effectiveness of protected area networks in reducing deforestation. *Proc Natl Acad Sci U*  
671 *S A*. 2008;105(42):16089–94.
- 672 12. Nolte C, Agrawal A, Silvius KM, Britaldo SSF. Governance regime and location influence  
673 avoided deforestation success of protected areas in the Brazilian Amazon. *Proc Natl*  
674 *Acad Sci U S A*. 2013;110(13):4956–61.
- 675 13. Vergara-Asenjo G, Potvin C. Forest protection and tenure status: THE key role of  
676 indigenous peoples and protected areas in Panama. *Glob Environ Chang*.

- 677 2014;28(1):205–15.
- 678 14. Anderson CM, Asner GP, Lactayo W, Lambin EF. Overlapping land allocations reduce  
679 deforestation in Peru. *Land use policy*. 2018;79(August 2017):174–8.
- 680 15. Blackman A, Veit P. Titled Amazon Indigenous Communities Cut Forest Carbon  
681 Emissions. *Ecol Econ* [Internet]. 2018;153(July 2017):56–67. Available from:  
682 <https://doi.org/10.1016/j.ecolecon.2018.06.016>
- 683 16. Blackman A. Strict versus mixed-use protected areas: Guatemala’s Maya Biosphere  
684 Reserve. *Ecol Econ* [Internet]. 2015;112:14–24. Available from:  
685 <http://dx.doi.org/10.1016/j.ecolecon.2015.01.009>
- 686 17. Pfaff A, Robalino J, Lima E, Sandoval C, Herrera LD. Governance, Location and Avoided  
687 Deforestation from Protected Areas: Greater Restrictions Can Have Lower Impact, Due to  
688 Differences in Location. *World Dev*. 2014;55:7–20.
- 689 18. Mertz O, Müller D, Sikor T, Hett C, Heinimann A, Castella JC, et al. The forgotten D:  
690 Challenges of addressing forest degradation in complex mosaic landscapes under  
691 REDD+. *Geogr Tidsskr*. 2012;112(1):63–76.
- 692 19. van Vliet N, Mertz O, Heinimann A, Langanke T, Pascual U, Schmook B, et al. Trends,  
693 drivers and impacts of changes in swidden cultivation in tropical forest-agriculture  
694 frontiers: A global assessment. *Glob Environ Chang* [Internet]. 2012;22(2):418–29.  
695 Available from: <http://dx.doi.org/10.1016/j.gloenvcha.2011.10.009>
- 696 20. Bruun TB, de Neergaard A, Lawrence D, Ziegler AD. Environmental consequences of the  
697 demise in Swidden cultivation in Southeast Asia: Carbon storage and soil quality. *Hum  
698 Ecol*. 2009;37(3):375–88.
- 699 21. Andrade RB, Balch JK, Parsons AL, Armenteras D, Roman-Cuesta RM, Bulkan J.  
700 Scenarios in tropical forest degradation: Carbon stock trajectories for REDD+. *Carbon  
701 Balance Manag*. 2017;12(1):1–7.
- 702 22. Karsenty A, Romero C, Cerutti PO, Doucet JL, Putz FE, Bernard C, et al. Deforestation

- 703 and timber production in Congo after implementation of sustainable management policy:  
704 A reaction to the article by J.S. Brandt, C. Nolte and A. Agrawal (Land Use Policy 52:15–  
705 22). Land use policy [Internet]. 2017;65:62–5. Available from:  
706 <http://dx.doi.org/10.1016/j.landusepol.2017.02.032>
- 707 23. Bowker JN, De Vos A, Ament JM, Cumming GS. Effectiveness of Africa’s tropical  
708 protected areas for maintaining forest cover. *Conserv Biol*. 2017;31(3):559–69.
- 709 24. Zhao H, Wu R, Long Y, Hu J, Yang F, Jin T, et al. Individual-level performance of nature  
710 reserves in forest protection and the effects of management level and establishment age.  
711 *Biol Conserv* [Internet]. 2019;233(February):23–30. Available from:  
712 <https://doi.org/10.1016/j.biocon.2019.02.024>
- 713 25. Gaveau DLA, Kshatriya M, Sheil D, Sloan S, Molidena E, Wijaya A, et al. Reconciling  
714 Forest Conservation and Logging in Indonesian Borneo. *PLoS One*. 2013;8(8).
- 715 26. Bonilla-Mejía L, Higuera-Mendieta I. Protected Areas under Weak Institutions: Evidence  
716 from Colombia. *World Dev* [Internet]. 2019 Oct;122:585–96. Available from:  
717 <https://linkinghub.elsevier.com/retrieve/pii/S0305750X19301718>
- 718 27. Baragwanath K, Bayi E. Collective property rights reduce deforestation in the Brazilian  
719 Amazon. *Proc Natl Acad Sci U S A*. 2020;117(34):20495–502.
- 720 28. Keele LJ, Titiunik R, Zubizarreta JR. Enhancing a geographic regression discontinuity  
721 design through matching to estimate the effect of ballot initiatives on voter turnout. *J R  
722 Stat Soc Ser A Stat Soc*. 2015;178(1):223–39.
- 723 29. Baccini A, Goetz SJ, Walker WS, Laporte NT, Sun M, Sulla-Menashe D, et al. Estimated  
724 carbon dioxide emissions from tropical deforestation improved by carbon-density maps.  
725 *Nat Clim Chang* [Internet]. 2012;2(3):182–5. Available from:  
726 <http://dx.doi.org/10.1038/nclimate1354>
- 727 30. Baccini A, Walker W, Carvalho L, Farina M, Sulla-Menashe D, Houghton RA. Tropical  
728 forests are a net carbon source based on aboveground measurements of gain and loss.

- 729 Supplementary Materials. *Science* (80- ) [Internet]. 2017 Oct 13;358(6360):230–4.  
730 Available from: <http://www.sciencemag.org/lookup/doi/10.1126/science.aam5962>
- 731 31. Diamond A, Sekhon J. Genetic Matching for Estimating Causal Effects. *Rev Econ Stat*  
732 [Internet]. 2012;95(July):932–45. Available from:  
733 <http://sekhon.polisci.berkeley.edu/papers/GenMatch.pdf>
- 734 32. Iacus SM, King G, Porro G. cem : Software for Coarsened Exact Matching . *J Stat Softw.*  
735 2015;30(9).
- 736 33. Ho DE, Imai K, King G, Stuart EA. MatchIt : Nonparametric Preprocessing for Parametric  
737 Causal Inference . *J Stat Softw.* 2015;42(8).
- 738 34. Iacus SM, King G, Porro G. Society for Political Methodology Causal Inference without  
739 Balance Checking: Coarsened Exact Matching [Internet]. Vol. 20, Source: Political  
740 Analysis. 2012 [cited 2019 May 1]. Available from: <http://gking.harvard.edu/cem>;
- 741 35. Bates D, Maechler M, Bolker B, Walker S, Chistensen RHB, Singman H, et al. Linear  
742 mixed-effects models using “Eigen” and S4. 2019.
- 743 36. Keele LJ, Titiunik R. Geographic boundaries as regression discontinuities. *Polit Anal.*  
744 2015;23(1):127–55.
- 745 37. Negret PJ, Di-Marco M, Sonter LJ, Rhodes J, Possingham HP, Maron M. Effects of  
746 spatial autocorrelation and sampling design on estimates of protected area effectiveness.  
747 *Conserv Biol* [Internet]. 2020 Apr 28;cobi.13522. Available from:  
748 <https://onlinelibrary.wiley.com/doi/abs/10.1111/cobi.13522>
- 749 38. Vergara-assenjo G, Sharma D, Potvin C. Engaging Stakeholders : Assessing Accuracy of  
750 Participatory Mapping of Land Cover in Panama. 2015;8(December):432–9.
- 751 39. Porter-Bolland L, Ellis EA, Guariguata MR, Ruiz-Mallén I, Negrete-Yankelevich S, Reyes-  
752 García V. Community managed forests and forest protected areas: An assessment of  
753 their conservation effectiveness across the tropics. *For Ecol Manage* [Internet].  
754 2012;268:6–17. Available from: <http://dx.doi.org/10.1016/j.foreco.2011.05.034>



- 755 40. Newton P, A Oldekop J, Brodnig G, Karna BK, Agrawal A. Carbon, biodiversity, and  
756 livelihoods in forest commons: synergies, trade-offs, and implications for REDD+. *Environ*  
757 *Res Lett* [Internet]. 2016;11(4):1–7. Available from: [http://dx.doi.org/10.1088/1748-](http://dx.doi.org/10.1088/1748-9326/11/4/044017)  
758 [9326/11/4/044017](http://dx.doi.org/10.1088/1748-9326/11/4/044017)
- 759 41. Spracklen BD, Kalamandeen M, Galbraith D, Gloor E, Spracklen D V. A global analysis of  
760 deforestation in moist tropical forest protected areas. *PLoS One*. 2015;10(12):1–16.
- 761 42. Lui G V., Coomes DA. Tropical nature reserves are losing their buffer zones, but leakage  
762 is not to blame. *Environ Res* [Internet]. 2016;147:580–9. Available from:  
763 <http://dx.doi.org/10.1016/j.envres.2015.11.008>
- 764 43. Clerici N, Armenteras D, Kareiva P, Botero R, Ramírez-Delgado JP, Forero-Medina G, et  
765 al. Deforestation in Colombian protected areas increased during post-conflict periods. *Sci*  
766 *Rep*. 2020;10(1):1–10.
- 767 44. Kirby KR, Potvin C. Variation in carbon storage among tree species: Implications for the  
768 management of a small-scale carbon sink project. *For Ecol Manage*. 2007;246(2–3):208–  
769 21.
- 770 45. Tschakert P, Coomes OT, Potvin C. Indigenous livelihoods, slash-and-burn agriculture,  
771 and carbon stocks in Eastern Panama. *Ecol Econ*. 2007;60(4):807–20.
- 772 46. Puc-Alcocer M, Arce-Ibarra AM, Cortina-Villar S, Estrada-Lugo EIJ. Rainforest  
773 conservation in Mexico’s lowland Maya area: Integrating local meanings of conservation  
774 and land-use dynamics. *For Ecol Manage* [Internet]. 2019;448(June):300–11. Available  
775 from: <https://doi.org/10.1016/j.foreco.2019.06.016>
- 776 47. Gray C, Billsborrow R. Stability and change within indigenous land use in the Ecuadorian  
777 Amazon. *Glob Environ Chang* [Internet]. 2020;63(June):102116. Available from:  
778 <https://doi.org/10.1016/j.gloenvcha.2020.102116>
- 779 48. Redo DJ, Grau HR, Aide TM, Clark ML. Asymmetric forest transition driven by the  
780 interaction of socioeconomic development and environmental heterogeneity in Central

- 781 America. Proc Natl Acad Sci [Internet]. 2012;109(23):8839–44. Available from:  
782 <http://www.pnas.org/cgi/doi/10.1073/pnas.1201664109>
- 783 49. Fearnside P, Fearnside P. Deforestation of the Brazilian Amazon. Oxford Research  
784 Encyclopedia of Environmental Science. 2017. 1–52 p.
- 785 50. Potapov P, Hansen MC, Laestadius L, Turubanova S, Yaroshenko A, Thies C, et al. The  
786 last frontiers of wilderness: Tracking loss of intact forest landscapes from 2000 to 2013.  
787 Sci Adv. 2017;3(1):1–14.
- 788 51. Gallice GR, Larrea-Gallegos G, Vázquez-Rowe I. The threat of road expansion in the  
789 Peruvian Amazon. Oryx [Internet]. 2019 Apr 27;53(2):284–92. Available from:  
790 [https://www.cambridge.org/core/product/identifier/S0030605317000412/type/journal\\_artic](https://www.cambridge.org/core/product/identifier/S0030605317000412/type/journal_article)  
791 [le](https://www.cambridge.org/core/product/identifier/S0030605317000412/type/journal_article)
- 792 52. Lessmann J, Fajardo J, Muñoz J, Bonaccorso E. Large expansion of oil industry in the  
793 Ecuadorian Amazon: biodiversity vulnerability and conservation alternatives. Ecol Evol.  
794 2016;6(14):4997–5012.
- 795 53. Carvalho WD, Mustin K, Hilário RR, Vasconcelos IM, Eilers V, Fearnside PM.  
796 Deforestation control in the Brazilian Amazon: A conservation struggle being lost as  
797 agreements and regulations are subverted and bypassed. Perspect Ecol Conserv  
798 [Internet]. 2019 Jul;17(3):122–30. Available from:  
799 <https://linkinghub.elsevier.com/retrieve/pii/S2530064418301263>
- 800 54. Vergara-Asenjo G, Mateo-Vega J, Alvarado A, Potvin C. A participatory approach to  
801 elucidate the consequences of land invasions on REDD+ initiatives: A case study with  
802 Indigenous communities in Panama. PLoS One [Internet]. 2017;12(12):1–19. Available  
803 from: <http://dx.doi.org/10.1371/journal.pone.0189463>
- 804 55. Busch J, Amarjargal O. Authority of Second-Tier Governments to Reduce Deforestation  
805 in 30 Tropical Countries. Front For Glob Chang. 2020;3(January):1–14.
- 806 56. Funk JM, Aguilar-Amuchastegui N, Baldwin-Cantello W, Busch J, Chuvasov E, Evans T,

- 807 et al. Securing the climate benefits of stable forests. *Clim Policy*. 2019;19(7):845–60.
- 808 57. Iacus SM, King G, Porro G. A Theory of Statistical Inference for Matching Methods in  
809 Causal Research. *Polit Anal* [Internet]. 2019 Jan 4;27(1):46–68. Available from:  
810 [https://www.cambridge.org/core/product/identifier/S1047198718000293/type/journal\\_artic](https://www.cambridge.org/core/product/identifier/S1047198718000293/type/journal_article)  
811 [le](https://www.cambridge.org/core/product/identifier/S1047198718000293/type/journal_article)
- 812 58. Unidad Administrativa del Sistema de Parques Nacionales Naturales. Política de  
813 Participación Social en la Conservación [Internet]. Bogotá: UAESPNN; 2001. 83 p.  
814 Available from:  
815 [http://www.parquesnacionales.gov.co/PNN/portel/libreria/pdf/politicadeparticipacinsocial2.](http://www.parquesnacionales.gov.co/PNN/portel/libreria/pdf/politicadeparticipacinsocial2.pdf)  
816 [pdf](http://www.parquesnacionales.gov.co/PNN/portel/libreria/pdf/politicadeparticipacinsocial2.pdf)
- 817 59. Radachowsky J, Ramos VH, McNab R, Baur EH, Kazakov N. Forest concessions in the  
818 Maya Biosphere Reserve, Guatemala: A decade later. *For Ecol Manage*. 2012;268:18–  
819 28.
- 820 60. Maniatis D, Scriven J, Jonckheere I, Laughlin J, Todd K. Toward REDD+ Implementation.  
821 *Annu Rev Environ Resour*. 2019;44(1):373–98.
- 822 61. Karsenty A, Vogel A, Castell F. “Carbon rights”, REDD+ and payments for environmental  
823 services. *Environ Sci Policy* [Internet]. 2014 Jan;35:20–9. Available from:  
824 <https://linkinghub.elsevier.com/retrieve/pii/S1462901112001463>
- 825
- 826
- 827
- 828

829

830 **Supplementary Material**

831

| <b>Jurisdiction</b>     | <b>Geo-spatial Information</b>                   | <b>Source</b>                                                                                                                                           |
|-------------------------|--------------------------------------------------|---------------------------------------------------------------------------------------------------------------------------------------------------------|
| All regions             | Annual carbon density (2003 – 2016)              | Woods Hole Research Center (Baccini et al., 2012; Baccini et al., 2017).                                                                                |
| All regions             | Elevation and sope                               | Shuttle Radar Topographic Mission – USGS (United States Geological Survey)                                                                              |
| Petén (Guatemala)       | Roads, Towns (> 5000 inhabitants), Rivers.       | IDEG ("Infraestructura de datos espaciales de Guatemala").                                                                                              |
| Petén (Guatemala)       | PAs, Forest Concessions, and Multiple Use Zones. | ACOFOP ("Asociación de Comunidades Forestales de Petén"), Alianza Mesoamericana de los Pueblos, Prisma.                                                 |
| Panama                  | Roads, Towns (> 5000 inhabitants), Rivers, PAs.  | STRI ("Smithsonian Tropical Research Institute").                                                                                                       |
| Panama                  | Titled and Claimed ITs                           | Neotropical Ecology Laboratory (Prof. Catherin Potvin Universidad de McGill/STRI), COONAPIP (Coordinadora Nacional de los Pueblos Indígenas de Panamá). |
| Amazon Basin (Colombia, | PAs and ITs, Roads                               | RAISG (Red Amazónica de Información Socio-Ambiental Geo-Referenciada).                                                                                  |

Ecuador, Perú,

Brasil).

|          |                                             |                                                                                     |
|----------|---------------------------------------------|-------------------------------------------------------------------------------------|
| Colombia | Rivers                                      | IGAC ("Instituto Geográfico Agustín Codazzi").                                      |
| Colombia | Settlements (> 5000 inhabitants)            | DANE (Departamento Administrativo Nacional de Estadística).                         |
| Ecuador  | Settlements (> 10 000 inhabitants), Rivers. | IGM ("Instituto Geográfico Militar").                                               |
| Peru     | Rivers                                      | IGN ("Instituto Geográfico Nacional").                                              |
| Peru     | Settlements (> 5000 inhabitants)            | INEI ("Instituto Nacional de Estadística e Informática") and Ministry of Education. |
| Brazil   | Settlements (> 5000 inhabitants), Rivers.   | IBGE ("Instituto Brasileiro de Geografia e estadística").                           |

832

833 **S1 Appendix. Geospatial Information and its sources by jurisdiction.**

834

835

| Jurisdiction | Protected Lands | Roads (km) | Settlements (km) | Rivers (km) | Elevation (m) | Slope (%) |
|--------------|-----------------|------------|------------------|-------------|---------------|-----------|
| Panama       | PAs             | -25.91***  | -6.04***         | -0.23***    | 213.00***     | -2.00***  |
|              | ITs             | -52.36***  | -8.20***         | -0.33***    | -154.00***    | -2.00***  |
|              | OAs             | -109.12*** | -13.86***        | -0.01***    | -3.00***      | -3.00***  |
| Colombia     | PAs             | -29.10***  | -37.56***        | -0.25***    | 12.00***      | 0.00***   |
|              | ITs             | -13.92***  | -62.62***        | 0.16*       | 177.00*       | 1.00*     |
|              | OAs             | -28.87***  | -70.74***        | 1.07***     | 186.00***     | 1.00***   |
| Ecuador      | PAs             | -12.50***  | -8.66***         | -0.53***    | -309.00***    | -2.00***  |
|              | ITs             | -28.49***  | -16.21***        | 0.04***     | 415.00***     | 3.00***   |
|              | OAs             | -23.36***  | -25.11***        | -0.13***    | 447.00***     | 3.00***   |

|                      |                          |           |            |           |           |          |
|----------------------|--------------------------|-----------|------------|-----------|-----------|----------|
| Peru                 | PAs                      | -28.05*** | -46.95***  | -0.04***  | -22.00*** | 0.00***  |
|                      | ITs                      | 2.06***   | 5.07***    | 2.08***   | 29.00***  | 0.00***  |
|                      | OAs                      | -29.54*** | 3.26***    | -2.85***  | 235.00*** | 2.00***  |
| Brazil               | PAs                      | -27.22*** | -33.14***  | -3.54***  | 9.00***   | 0.00***  |
|                      | ITs                      | -32.17*** | -91.69***  | -7.91***  | -53.00*** | 0.00***  |
|                      | OAs                      | -15.65*** | -126.83*** | -15.65*** | -49.00*** | -1.00*** |
| Petén<br>(Guatemala) | Integral PAs             | -2.65***  | -9.14***   | -3.12***  | 70.00***  | 0.00***  |
|                      | Community<br>Managed PAs | 2.01***   | -6.18***   | -2.72***  | 23.00***  | 0.00***  |
|                      | Sustainable<br>Use PAs   | -1.38***  | -5.33***   | -1.26***  | 65.00***  | 0.00***  |
| Acre (Brazil)        | Integral PAs             | 19.24***  | -284***    | -29.30*** | -47.80*** | -0.01*** |
|                      | Community<br>Managed PAs | 24.56***  | 5.11***    | 18.08***  | 29.99***  | 0.02***  |
|                      | Sustainable<br>Use PAs   | 43.79***  | -25.50***  | 17.15***  | 24.45***  | 0.06***  |

836 **S2 Appendix. Covariates mean differences between other lands and protected lands by**

837 **jurisdiction and their statistical significance from Mann Whitney U tests. \*\*\* p < 0.001, \*\* p**

838 **< 0.01, \* p < 0.05.**

839

| Jurisdiction | Protected Land   | Covariates    |                     |                |                  |              |
|--------------|------------------|---------------|---------------------|----------------|------------------|--------------|
|              |                  | Roads<br>(km) | Settlements<br>(km) | Rivers<br>(km) | Elevation<br>(m) | Slope<br>(%) |
| Panama       | PAs              | 0.5           | 0.5                 | 0.5            | 50               | 1            |
|              | ITs              | 2.5           | 2                   | 1              | 100              | 1.5          |
|              | OAs              | 1             | 2                   | 1              | 150              | 1.5          |
| Colombia     | PAs              | 1             | 1                   | 0.5            | 50               | 1.5          |
|              | ITs              | 2             | 1                   | 1              | 50               | 1.5          |
|              | Overlapped Areas | 2             | 2                   | 1              | 100              | 1.5          |
| Ecuador      | PAs              | 1             | 1                   | 1              | 50               | 2            |
|              | ITs              | 1             | 2                   | 0.8            | 150              | 2            |
|              | OAs              | 0.5           | 2                   | 0.7            | 150              | 2            |
| Peru         | PAs              | 2             | 1                   | 2.5            | 200              | 2            |

|                      |                       |   |   |   |     |     |
|----------------------|-----------------------|---|---|---|-----|-----|
|                      | ITs                   | 1 | 1 | 1 | 150 | 2   |
|                      | OAs                   | 1 | 1 | 1 | 150 | 2   |
| Brazil               | PAs                   | 1 | 1 | 1 | 100 | 1   |
|                      | ITs                   | 1 | 1 | 1 | 200 | 1.5 |
|                      | OAs                   | 1 | 1 | 1 | 200 | 1.5 |
| Petén<br>(Guatemala) | Integral PAs          | 1 | 1 | 1 | 100 | 1   |
|                      | Community Managed PAs | 1 | 1 | 1 | 100 | 1   |
|                      | Sustainable Use PAs   | 1 | 1 | 1 | 100 | 1   |
| Acre (Brazil)        | Integral PAs          | 1 | 1 | 1 | 100 | 1   |
|                      | Community Managed PAs | 1 | 1 | 1 | 200 | 1.5 |
|                      | Sustainable Use PAs   | 1 | 1 | 1 | 200 | 1.5 |

840

841 **S3 Appendix. Coarsening Choices applied through Coarsened Exact Matching (CEM) by**  
 842 **jurisdiction across protected lands (PAs, ITs, and OAs).**

843

844 **S4 Appendix. Standard mean differences of covariates among other lands and protected**  
 845 **lands before (Pre-Match) (full circles) and after matching analysis (Matched) (empty**  
 846 **circles) across national-level and subnational-level jurisdictions.** At the National-level  
 847 (Panama, Colombia, Ecuador, Peru, and Brazil) protected lands are classified as ITs (orange),  
 848 OAs (yellow), and PAs (green). At the subnational-level (Petén and Acre), protected lands  
 849 correspond to Community-Managed PAs (light green), Sustainable Use PAs (cyan), and Integral  
 850 PAs (dark green). The standard mean difference expresses the size of the covariate imbalance  
 851 between other lands and a particular protected land relative to their pooled standard deviation.  
 852 Negative values imply higher covariate values in protected lands than other lands.

853

854 **S5 Appendix. The temporal effect of ITs (orange), OAs (yellow), and PAs (green) on**  
 855 **aboveground carbon stocks across neotropical countries.** Each point represents the  
 856 significant annual effects ( $p < 0.05$ ) of protected lands (ITs, OAs, and PAs). The temporal  
 857 effects are the annual differences of carbon stocks in protected lands and other lands after

858 controlling for the spatial location through matching analysis and linear mixed models. Error  
859 bars reflect 95% confidence intervals for the temporal effect derived from the linear mixed  
860 models.

861

862 **S6 Appendix. The carbon stocks baseline of ITs (orange), OAs (yellow), and PAs (green)**

863 **across neotropical countries.** Each point represents the mean annual carbon stocks found in  
864 other lands (i.e., carbon stocks baseline) that share a spatial location similar to protected lands  
865 (ITs, OAs, PAs) after matching analysis and linear mixed models. Error bars reflect 95%  
866 confidence intervals for the carbon stocks baselines derived from the linear mixed models.

867

868 **S7 Appendix. The temporal effect of Protected Areas (PAs) in Petén (Guatemala) and**

869 **Acre (Brazil) on carbon stocks.** The Community Managed PAs (light green) correspond to  
870 Community Concessions in the Maya Biosphere Reserve in Petén (Guatemala) and Extractive  
871 Reserves in Acre, Brazil (IUCN VI). Sustainable Use PAs (cyan) correspond to Private  
872 Concessions and Cooperatives in the Maya Biosphere Reserve (Petén, Guatemala) and  
873 National and State Forests in Acre (Brazil). Integral PAs (dark green) comprise IUCN categories  
874 I-IV in each jurisdiction. Each point represents the significant temporal effects of PAs. These  
875 temporal effects are the annual differences of carbon stocks in PAs and other lands after  
876 controlling for the spatial location through matching analysis and linear mixed models. Error  
877 bars reflect 95% confidence intervals for the temporal effects derived from the linear mixed  
878 models.

879

880 **S8 Appendix. The carbon stocks baseline of PAs categories in Petén (Guatemala) and**

881 **Acre (Brazil) on carbon stocks.** The Community Managed PAs (light green) correspond to  
882 Community Concessions in the Maya Biosphere Reserve in Petén (Guatemala) and Extractive  
883 Reserves in Acre, Brazil (IUCN VI). Sustainable Use PAs (cyan) correspond to Private



884 Concessions and Cooperatives in the Maya Biosphere Reserve (Petén, Guatemala) and  
885 National and State Forests in Acre (Brazil). Integral PAs (dark green) comprise IUCN categories  
886 I-IV in each jurisdiction. Each point represents the mean annual carbon stocks found in other  
887 lands (i.e., carbon stocks baseline) that share a spatial location similar to PAs categories after  
888 matching analysis and linear mixed models. Error bars reflect 95% confidence intervals for the  
889 carbon stocks baselines derived from the linear mixed models.

890

891 **S9 Appendix. The carbon stocks baseline outside the boundaries of across neotropical**  
892 **countries.** Full (2016) or empty (2003) points represent the mean annual carbon stocks found  
893 in other lands (i.e., carbon stocks baseline) outside the boundaries of ITs (orange), OAs  
894 (yellow), and PAs (green) at a certain distance,. Error bars reflect 95% confidence intervals for  
895 the carbon stocks baselines derived from the linear mixed models.

896

897 **S10 Appendix. The carbon stocks baseline outside PAs' boundaries in Petén (Guatemala)**  
898 **and Acre (Brazil).** The Community Managed PAs (light green) correspond to Community  
899 Concessions in the Maya Biosphere Reserve in Petén (Guatemala), and Extractive Reserves in  
900 Acre, Brazil (IUCN VI). Sustainable Use PAs (cyan) correspond to Private Concessions and  
901 Cooperatives in the Maya Biosphere Reserve (Petén, Guatemala) and National and State  
902 Forests in Acre (Brazil). Integral PAs (dark green) comprise IUCN categories I-IV in each  
903 jurisdiction. Each dot represents the mean annual carbon stocks found in other lands (i.e.,  
904 carbon stocks baseline) outside PAs' boundaries at a certain distance, according to geographic  
905 discontinuity designs. Error bars reflect 95% confidence intervals for the carbon stocks  
906 baselines derived from the linear mixed models.

907

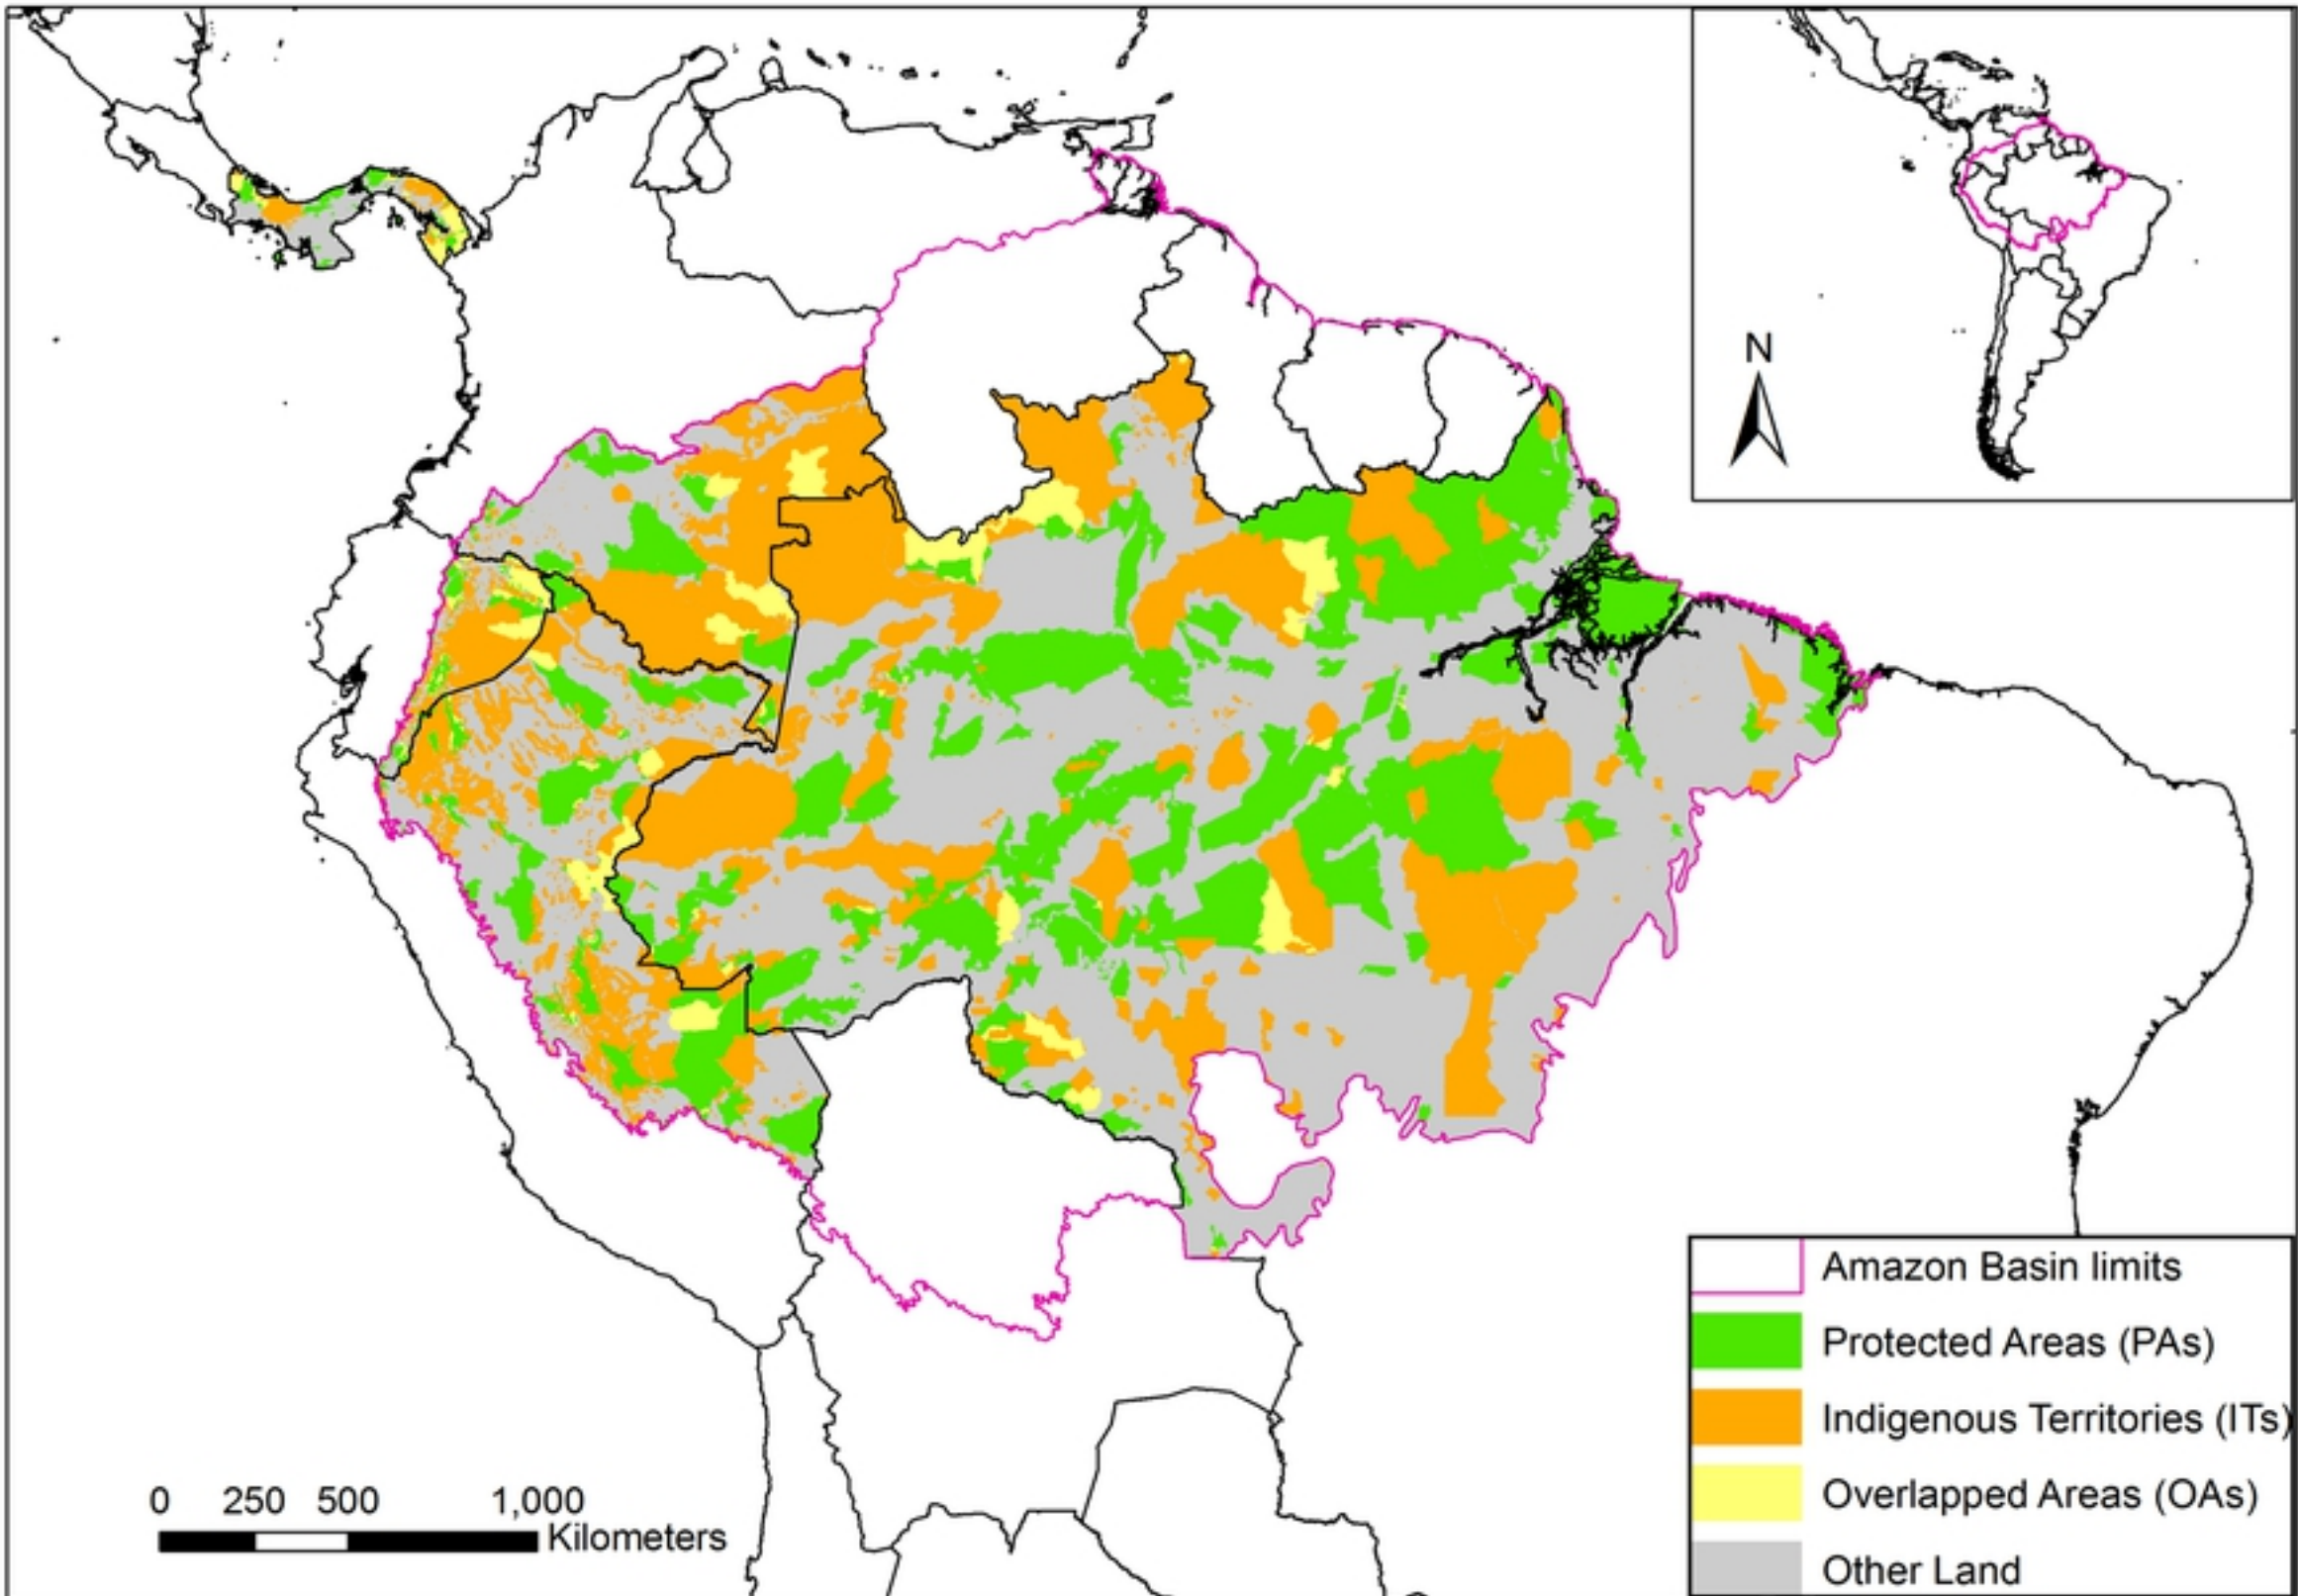

Fig 1

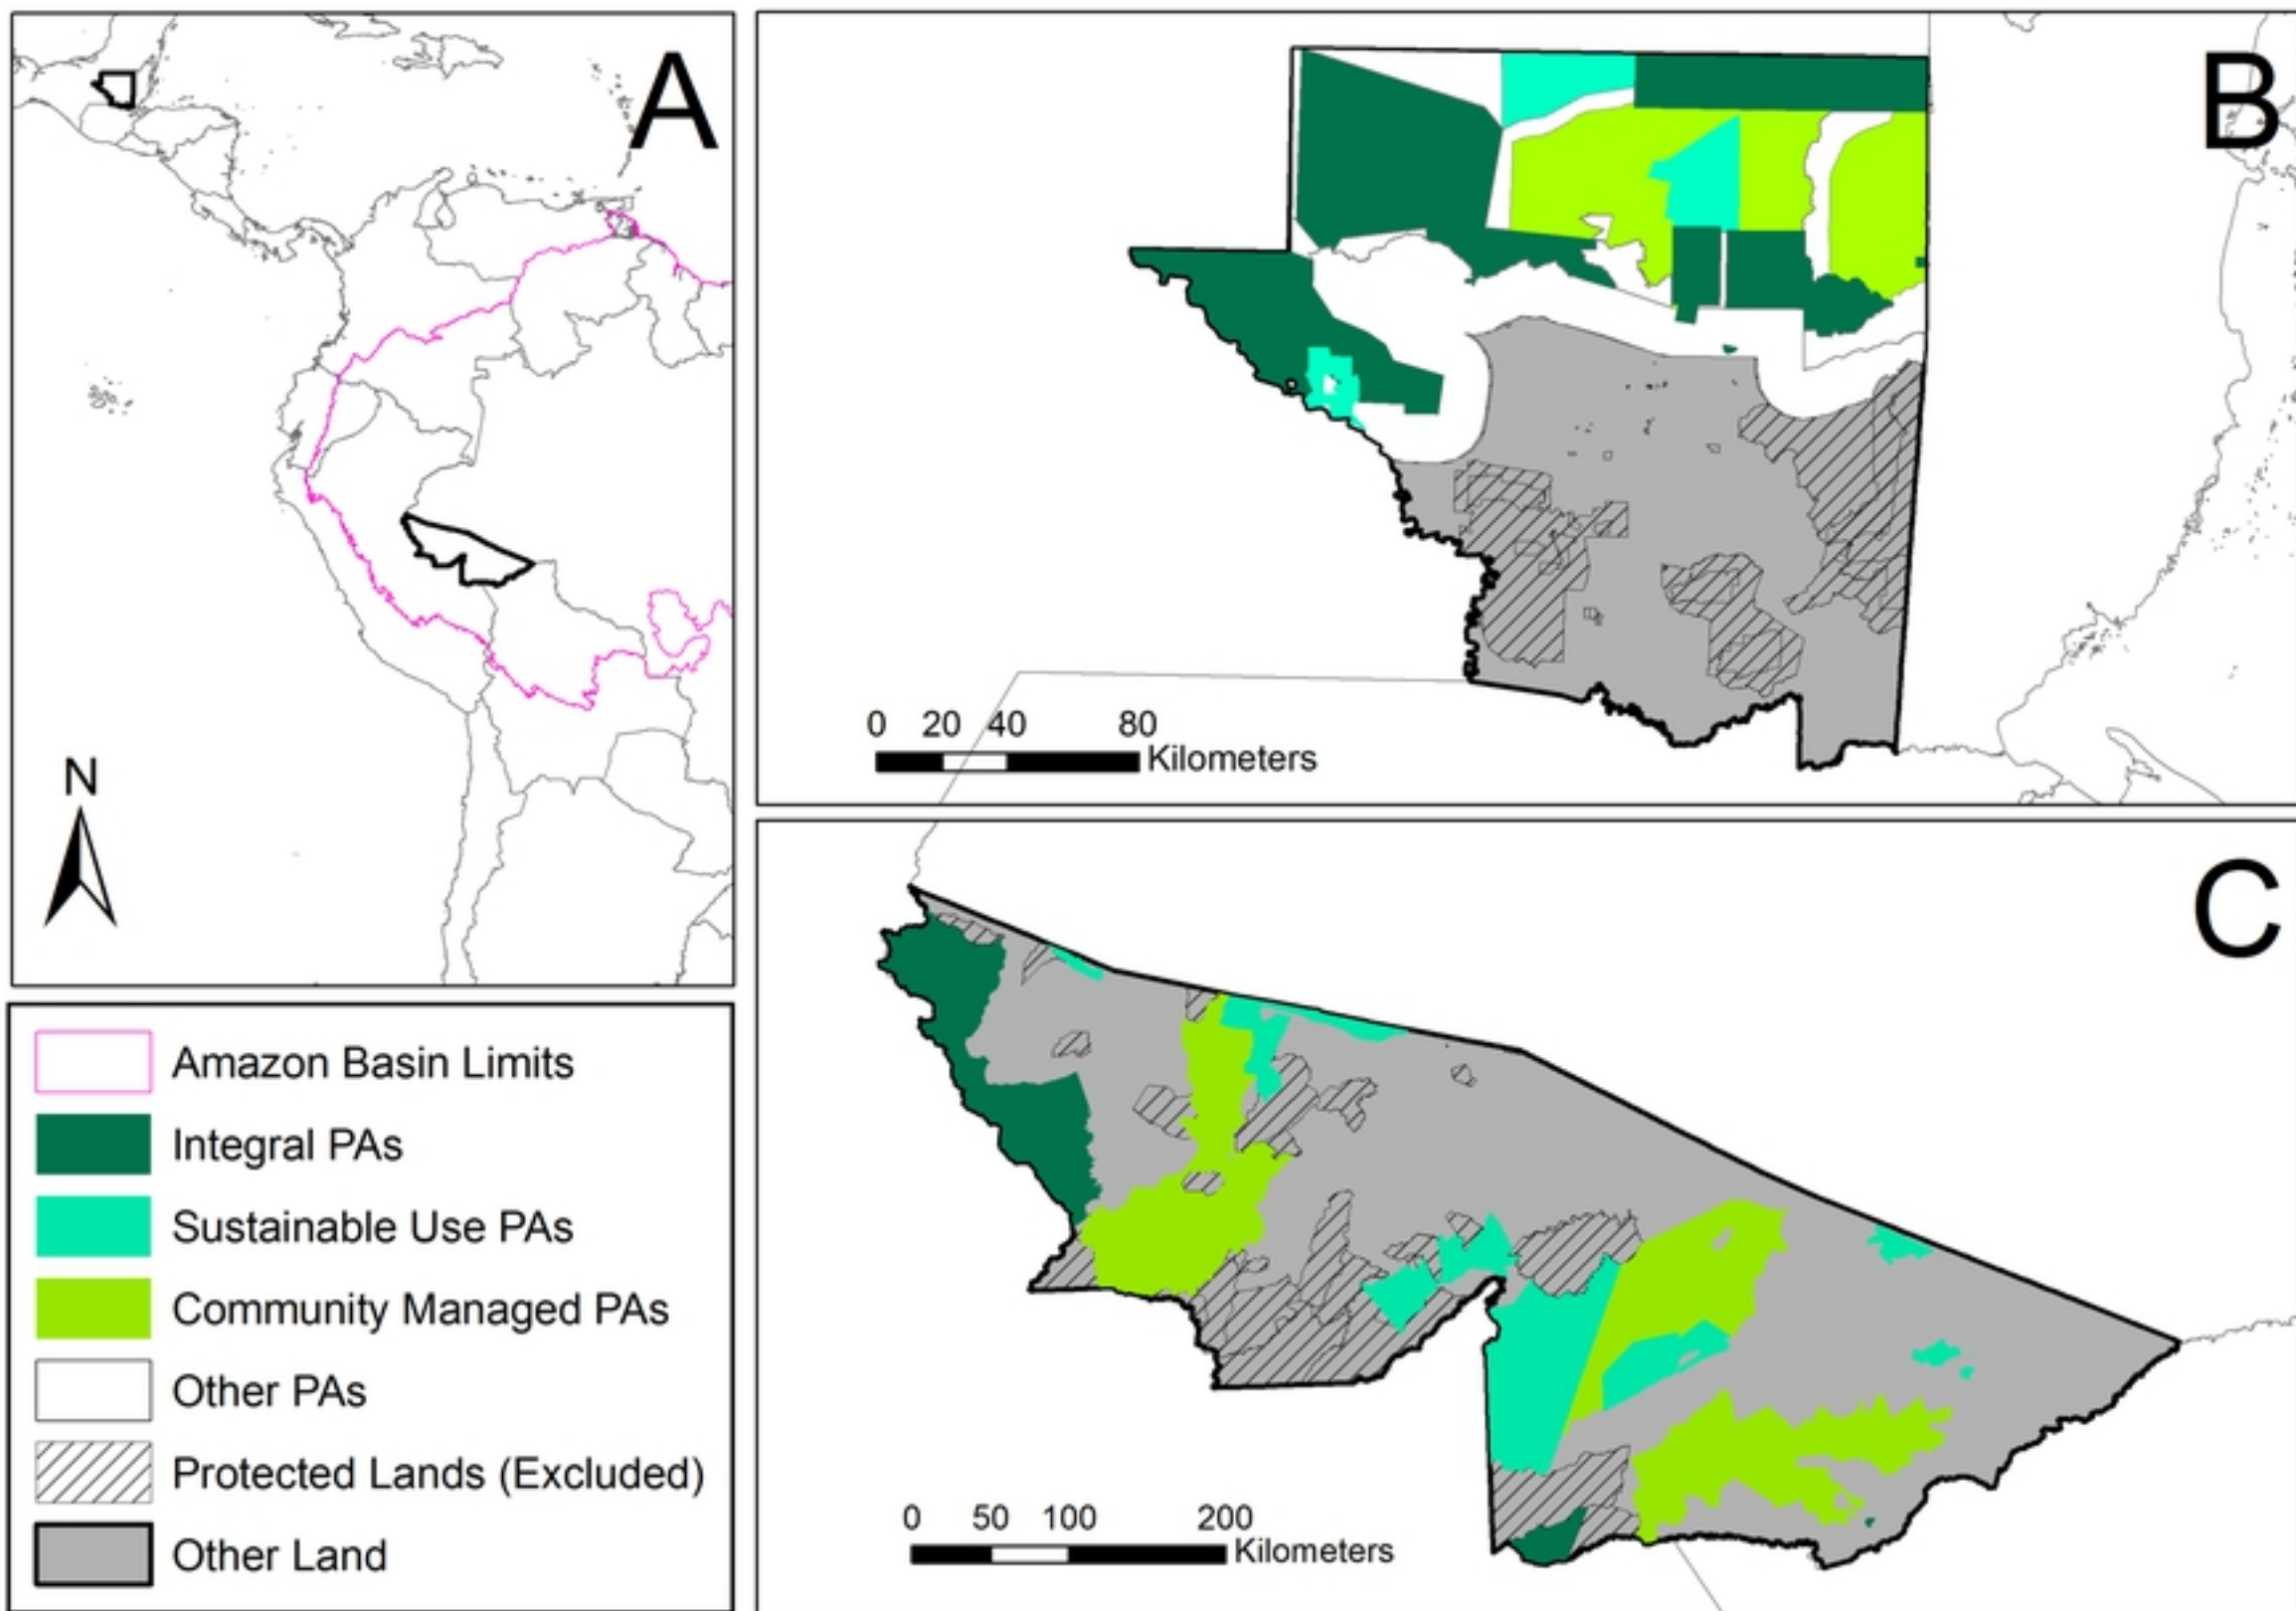

Fig 2

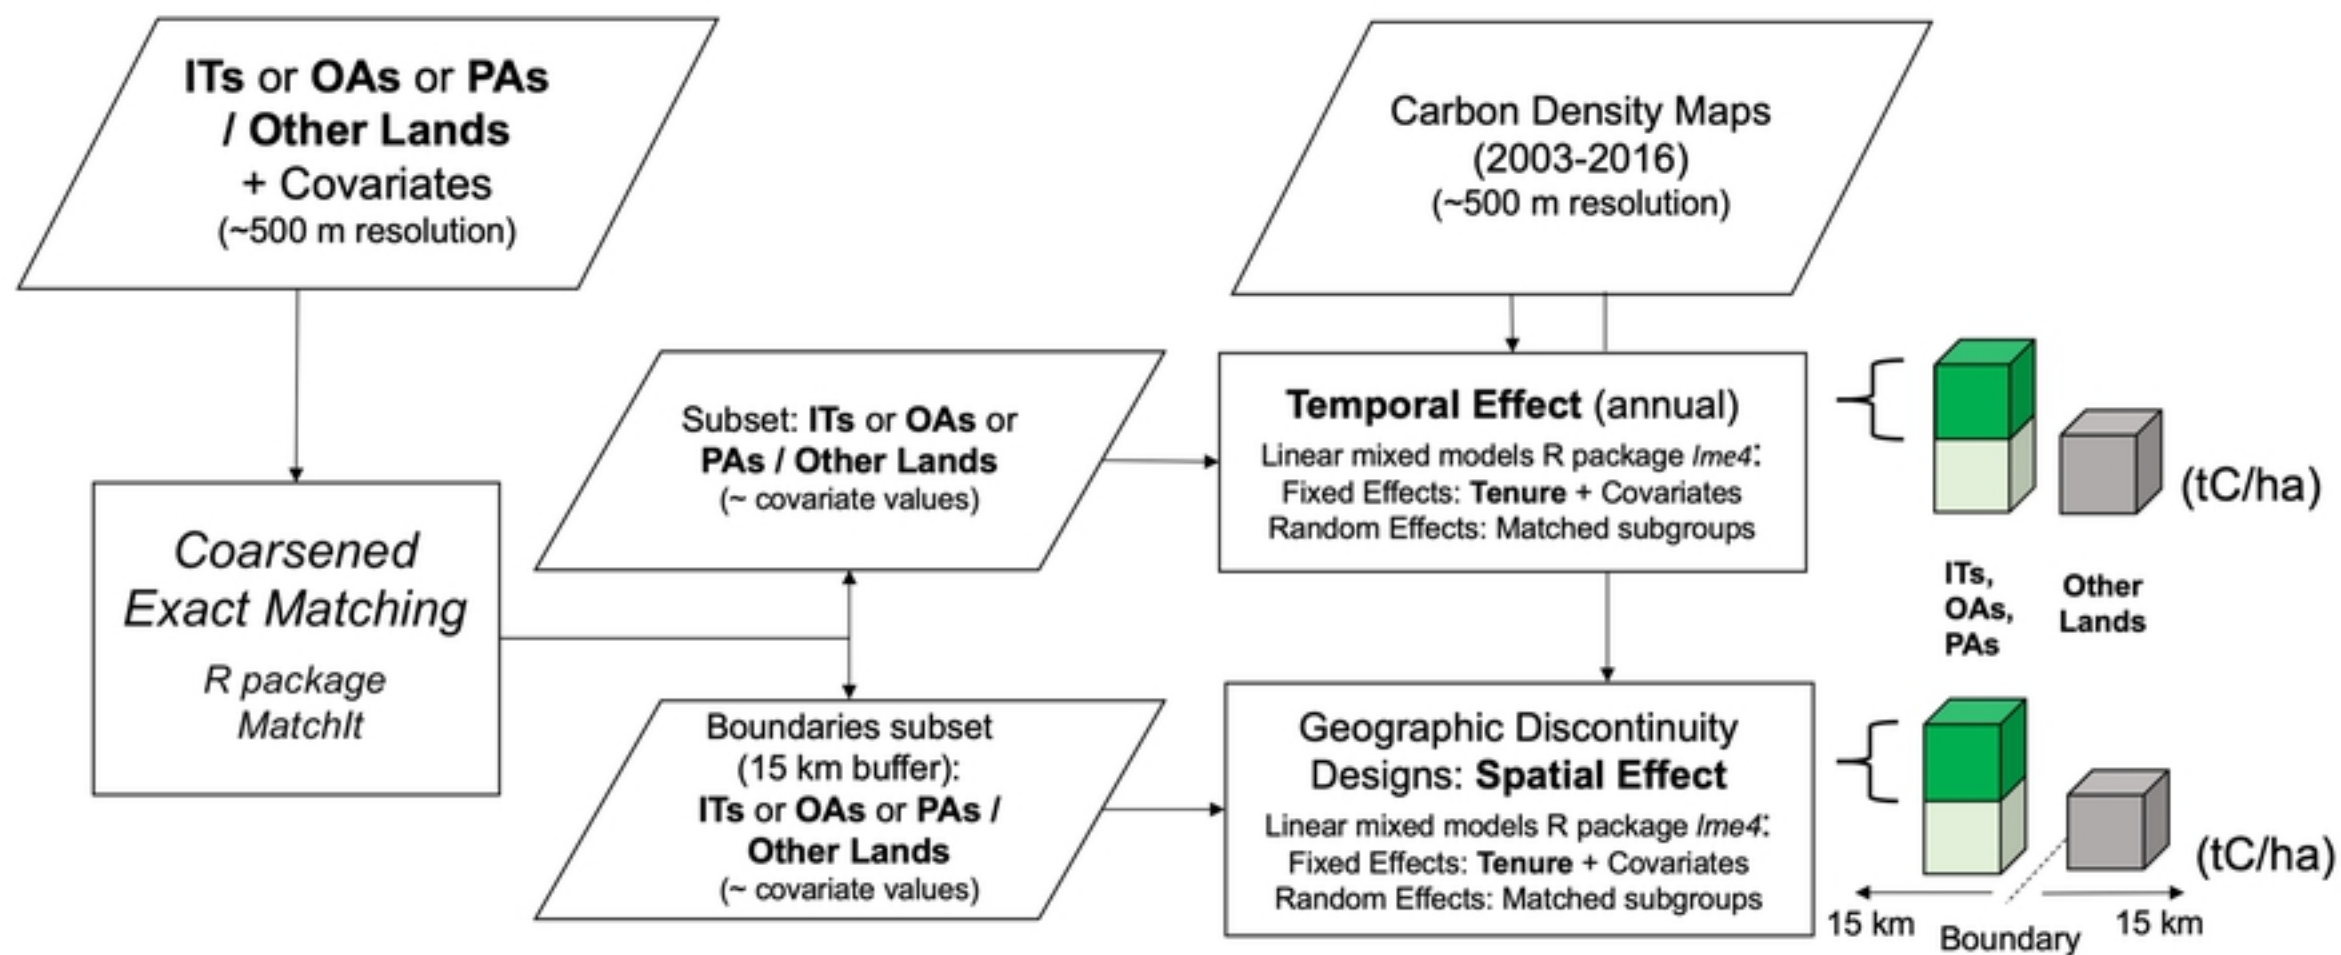

Fig 3



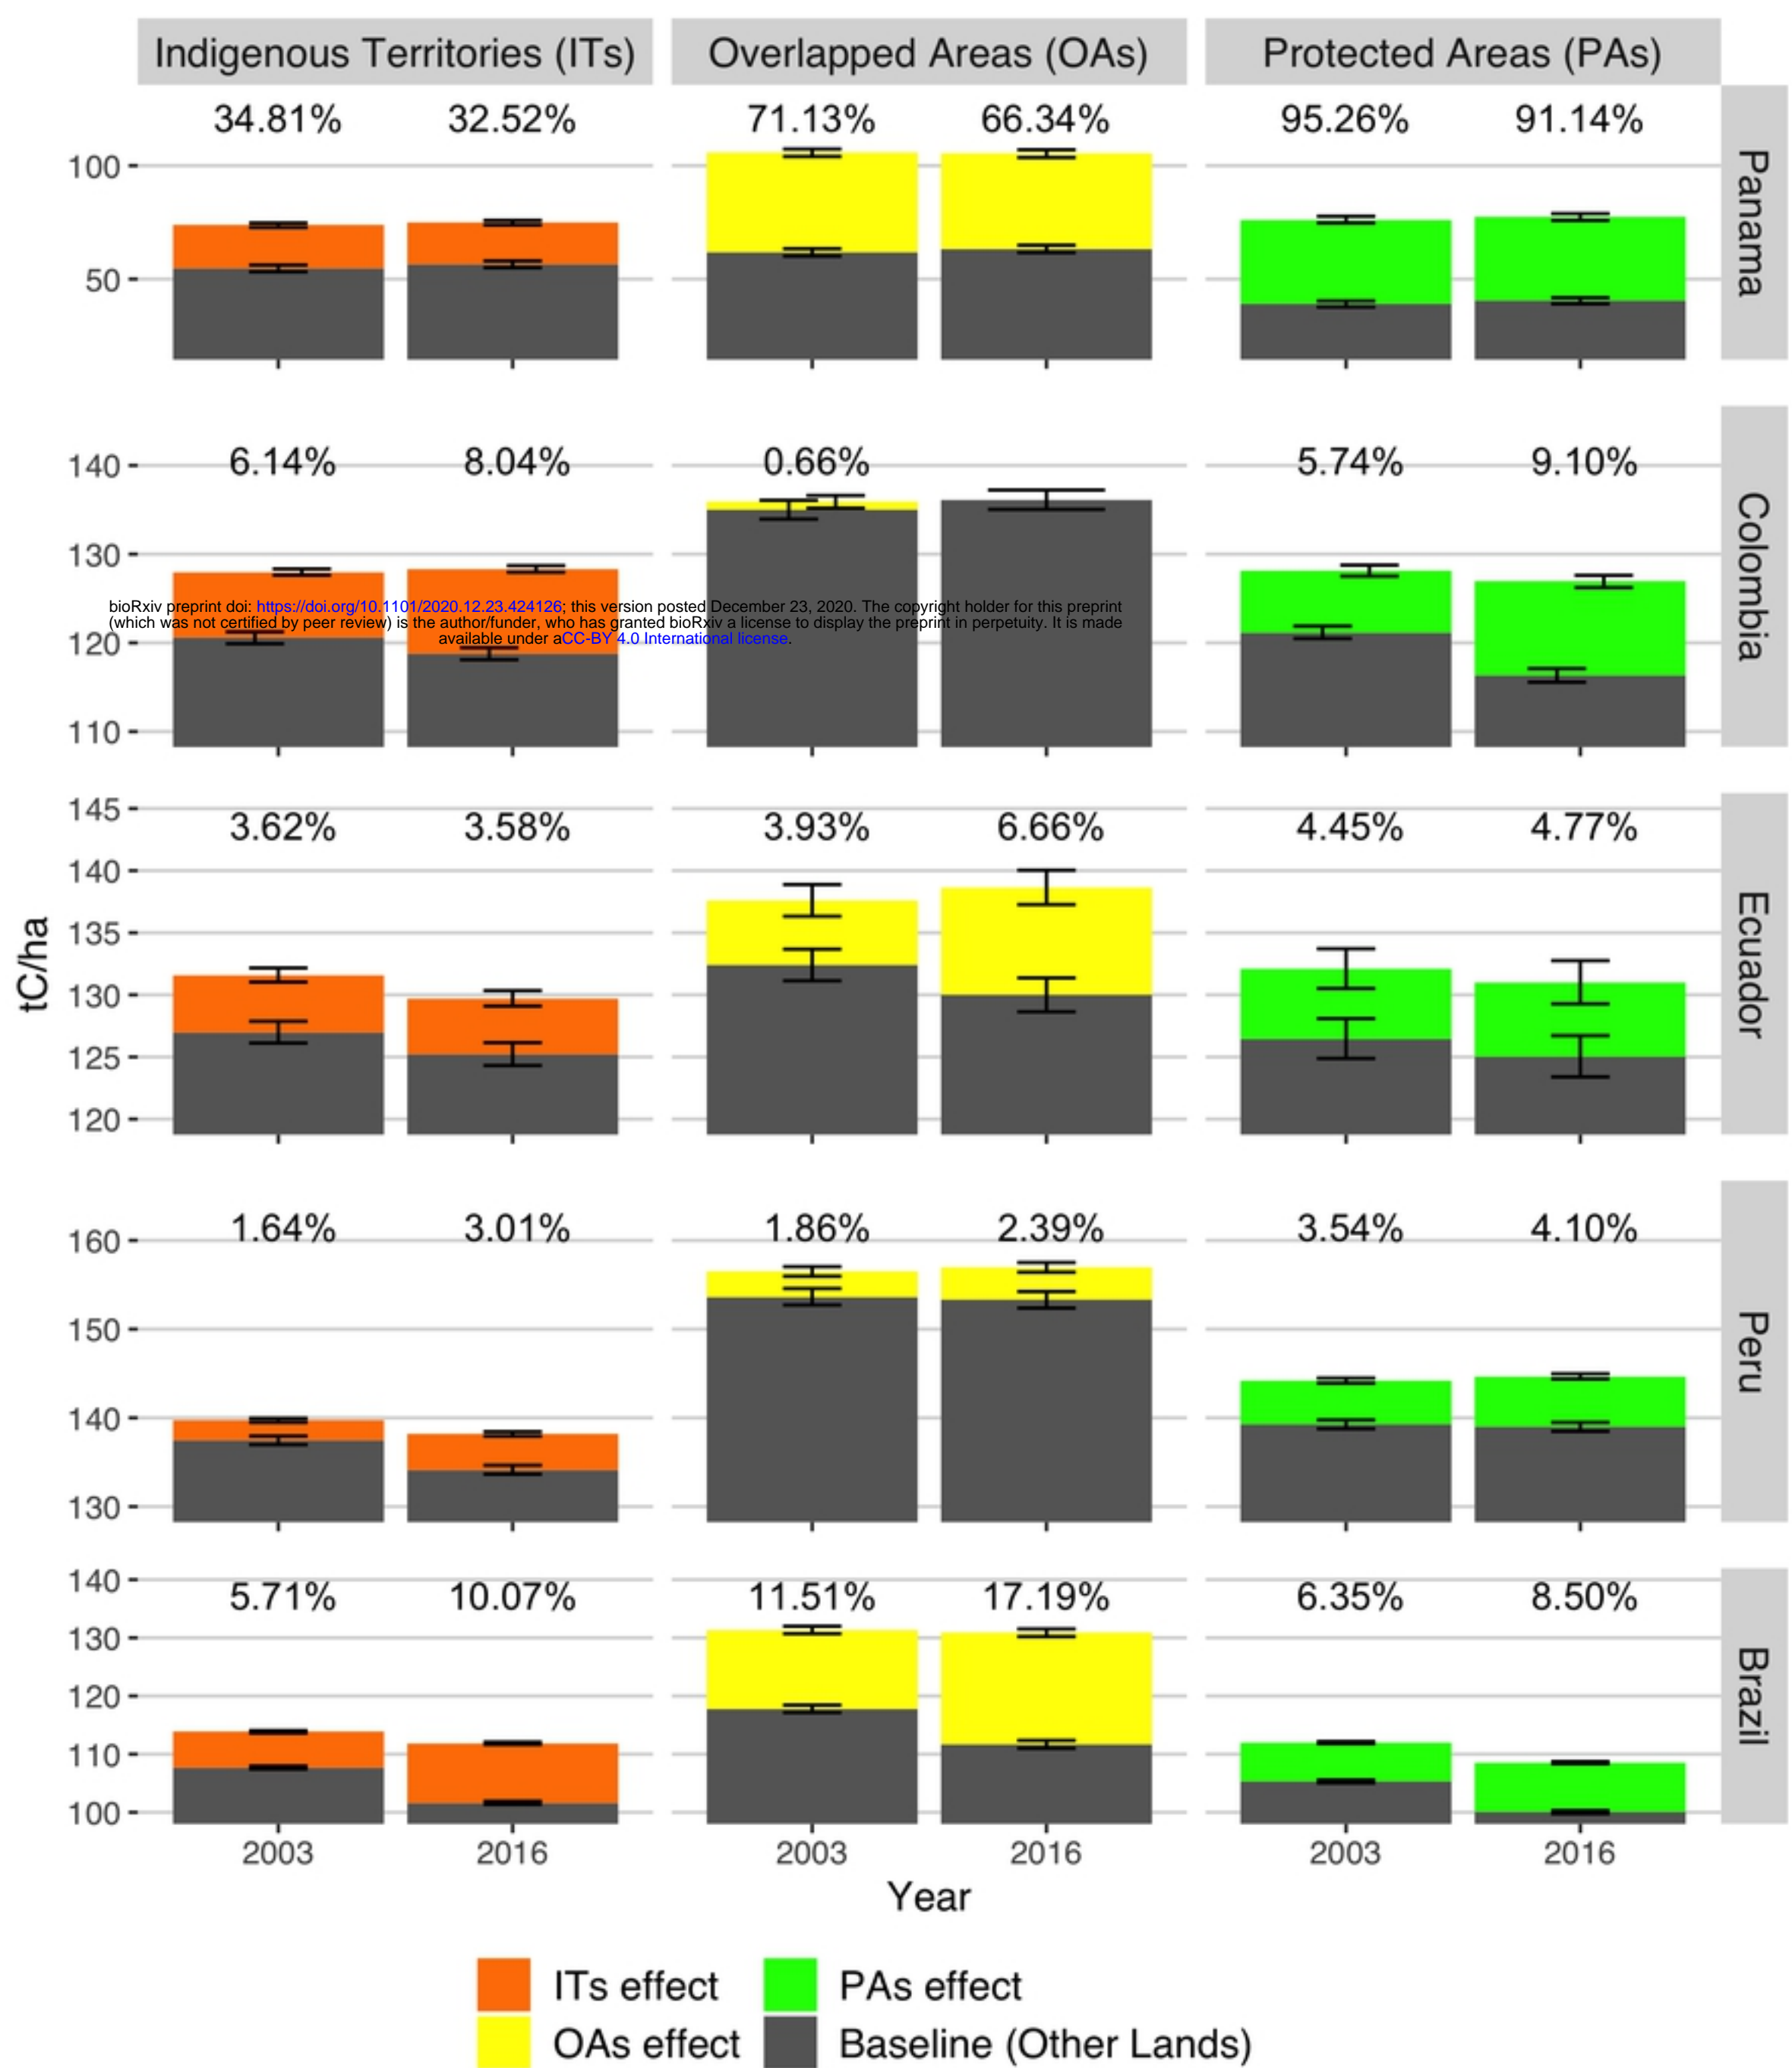

Fig 4

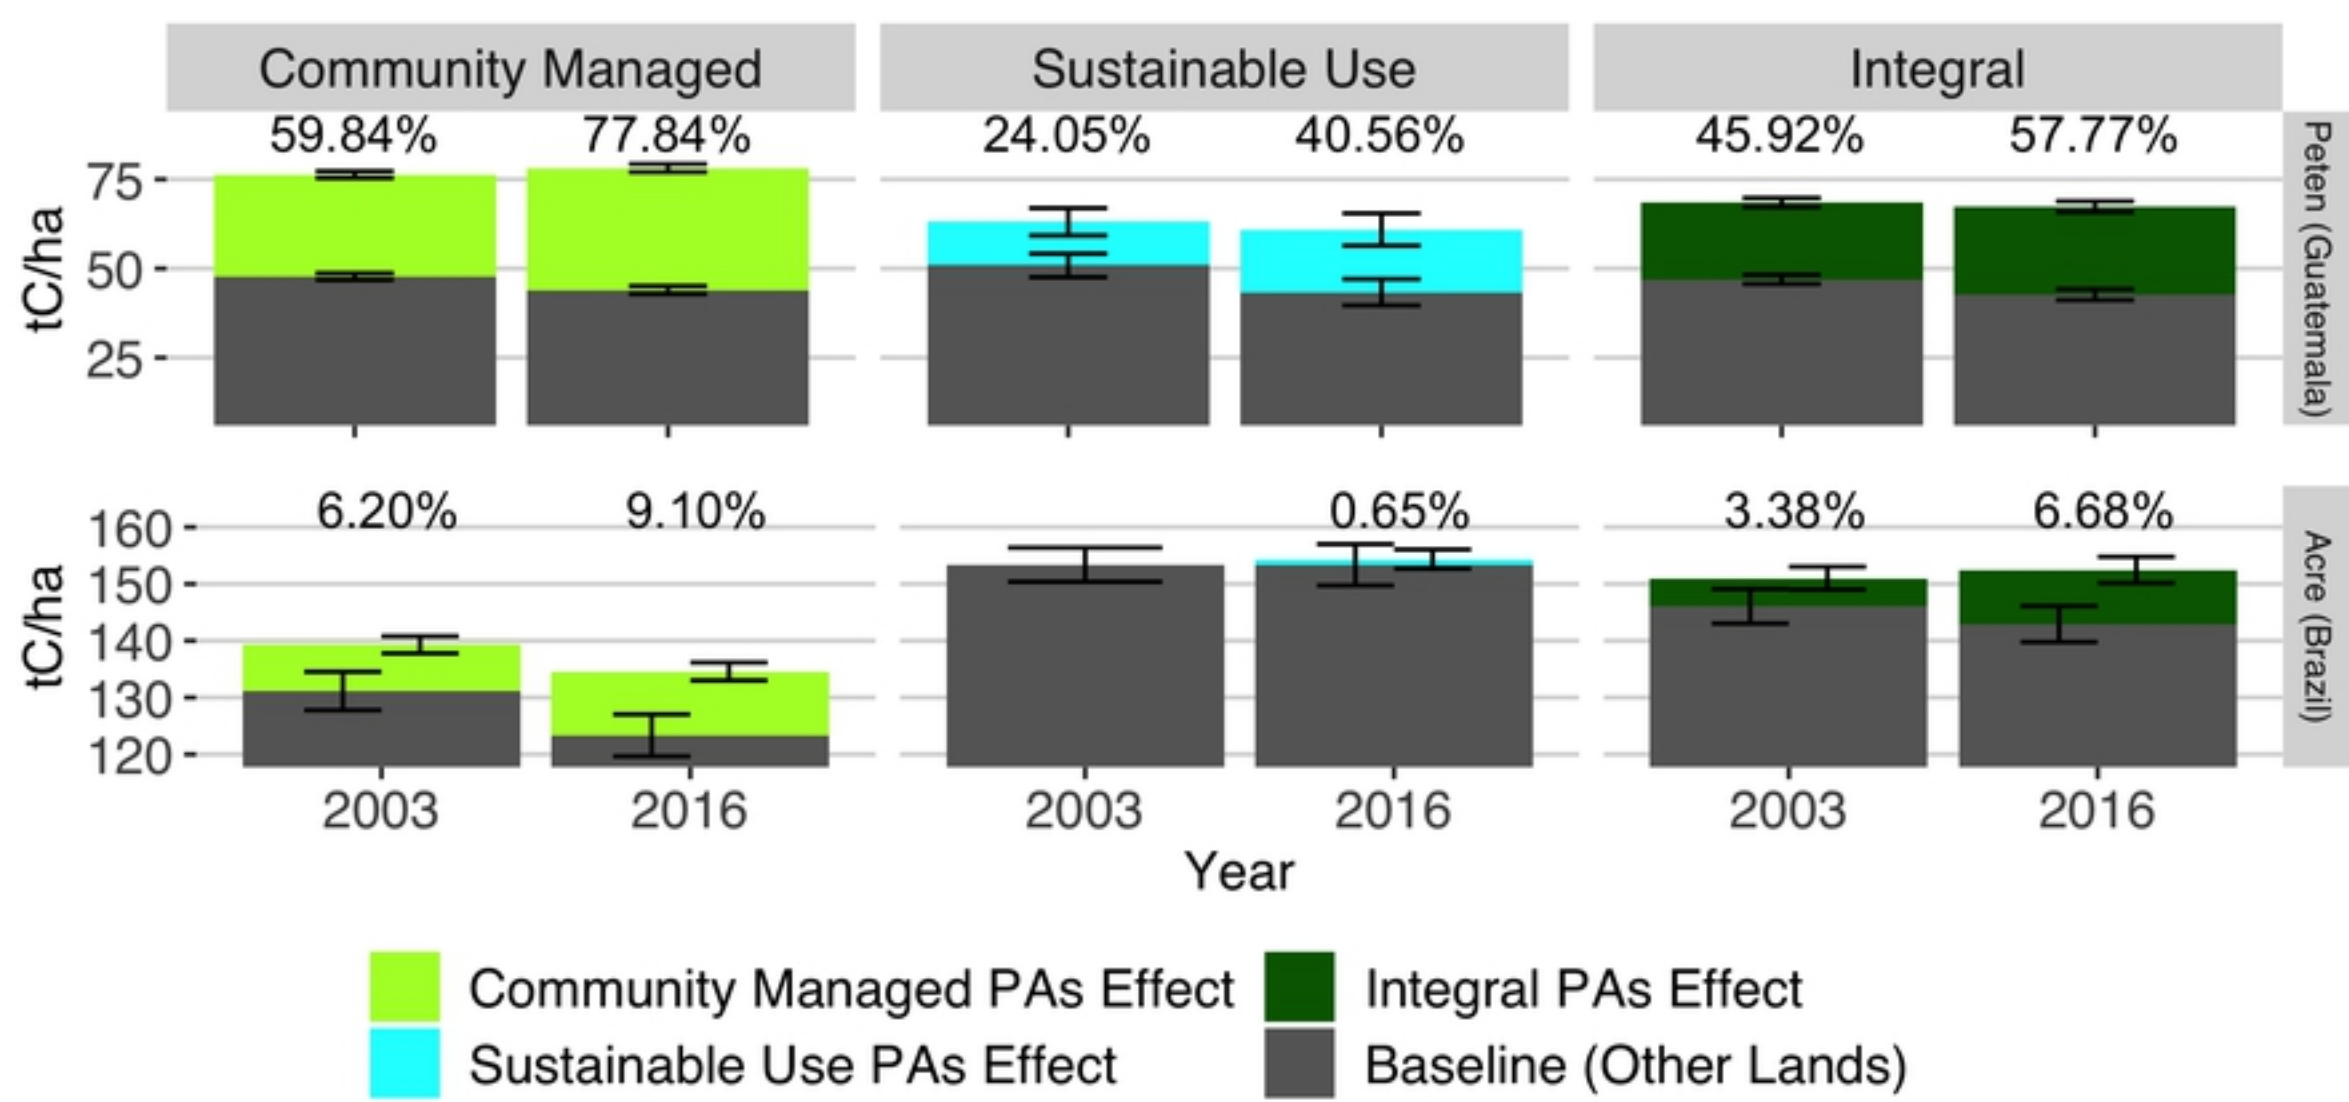

Fig 5

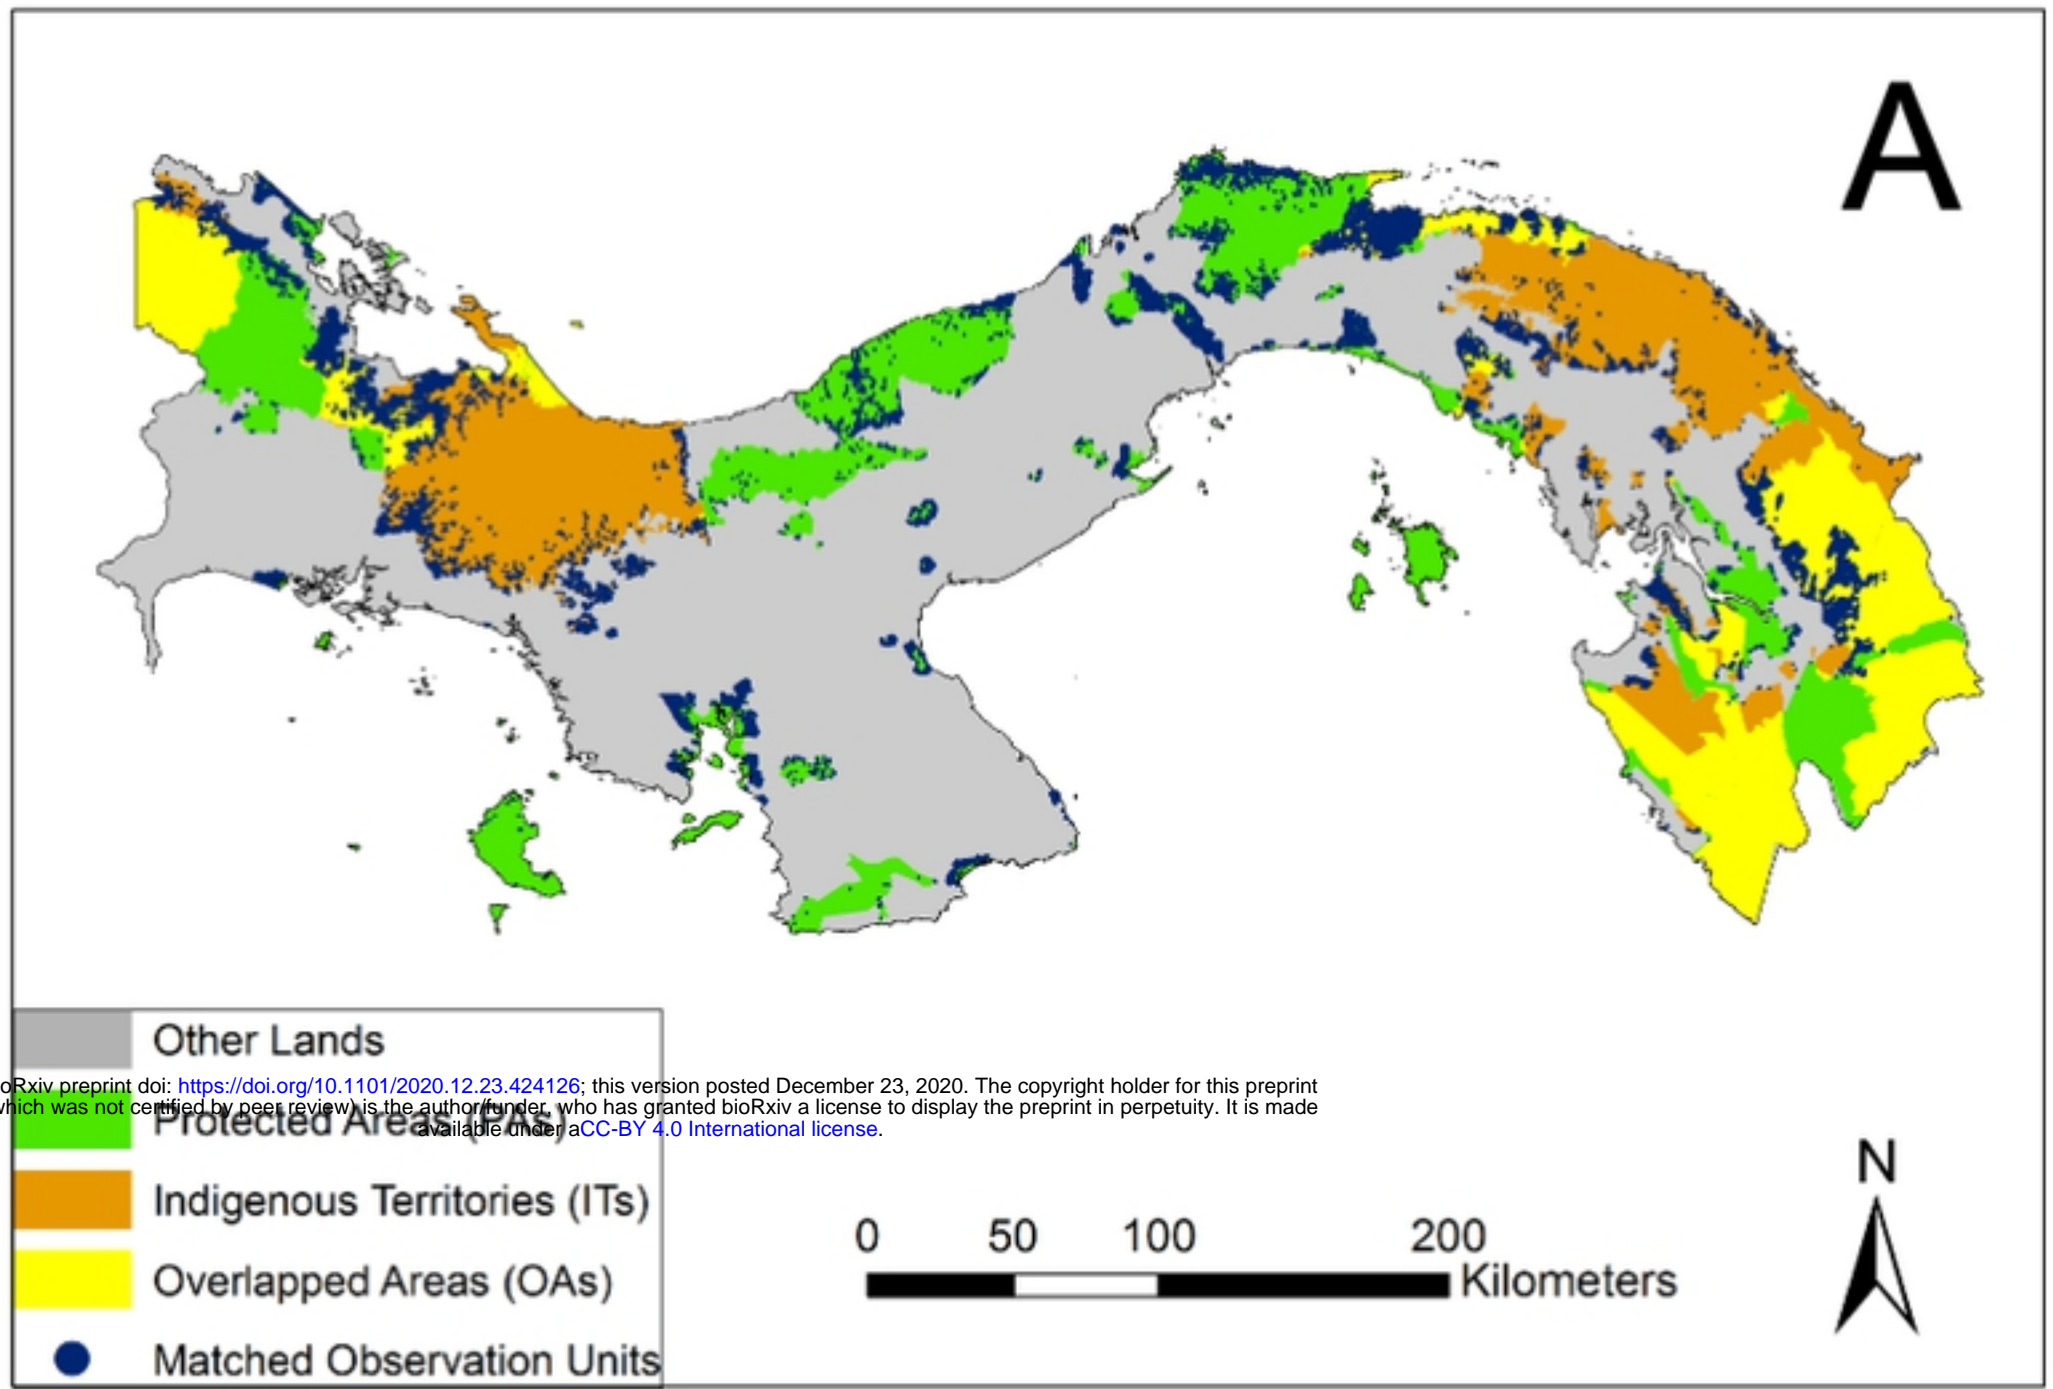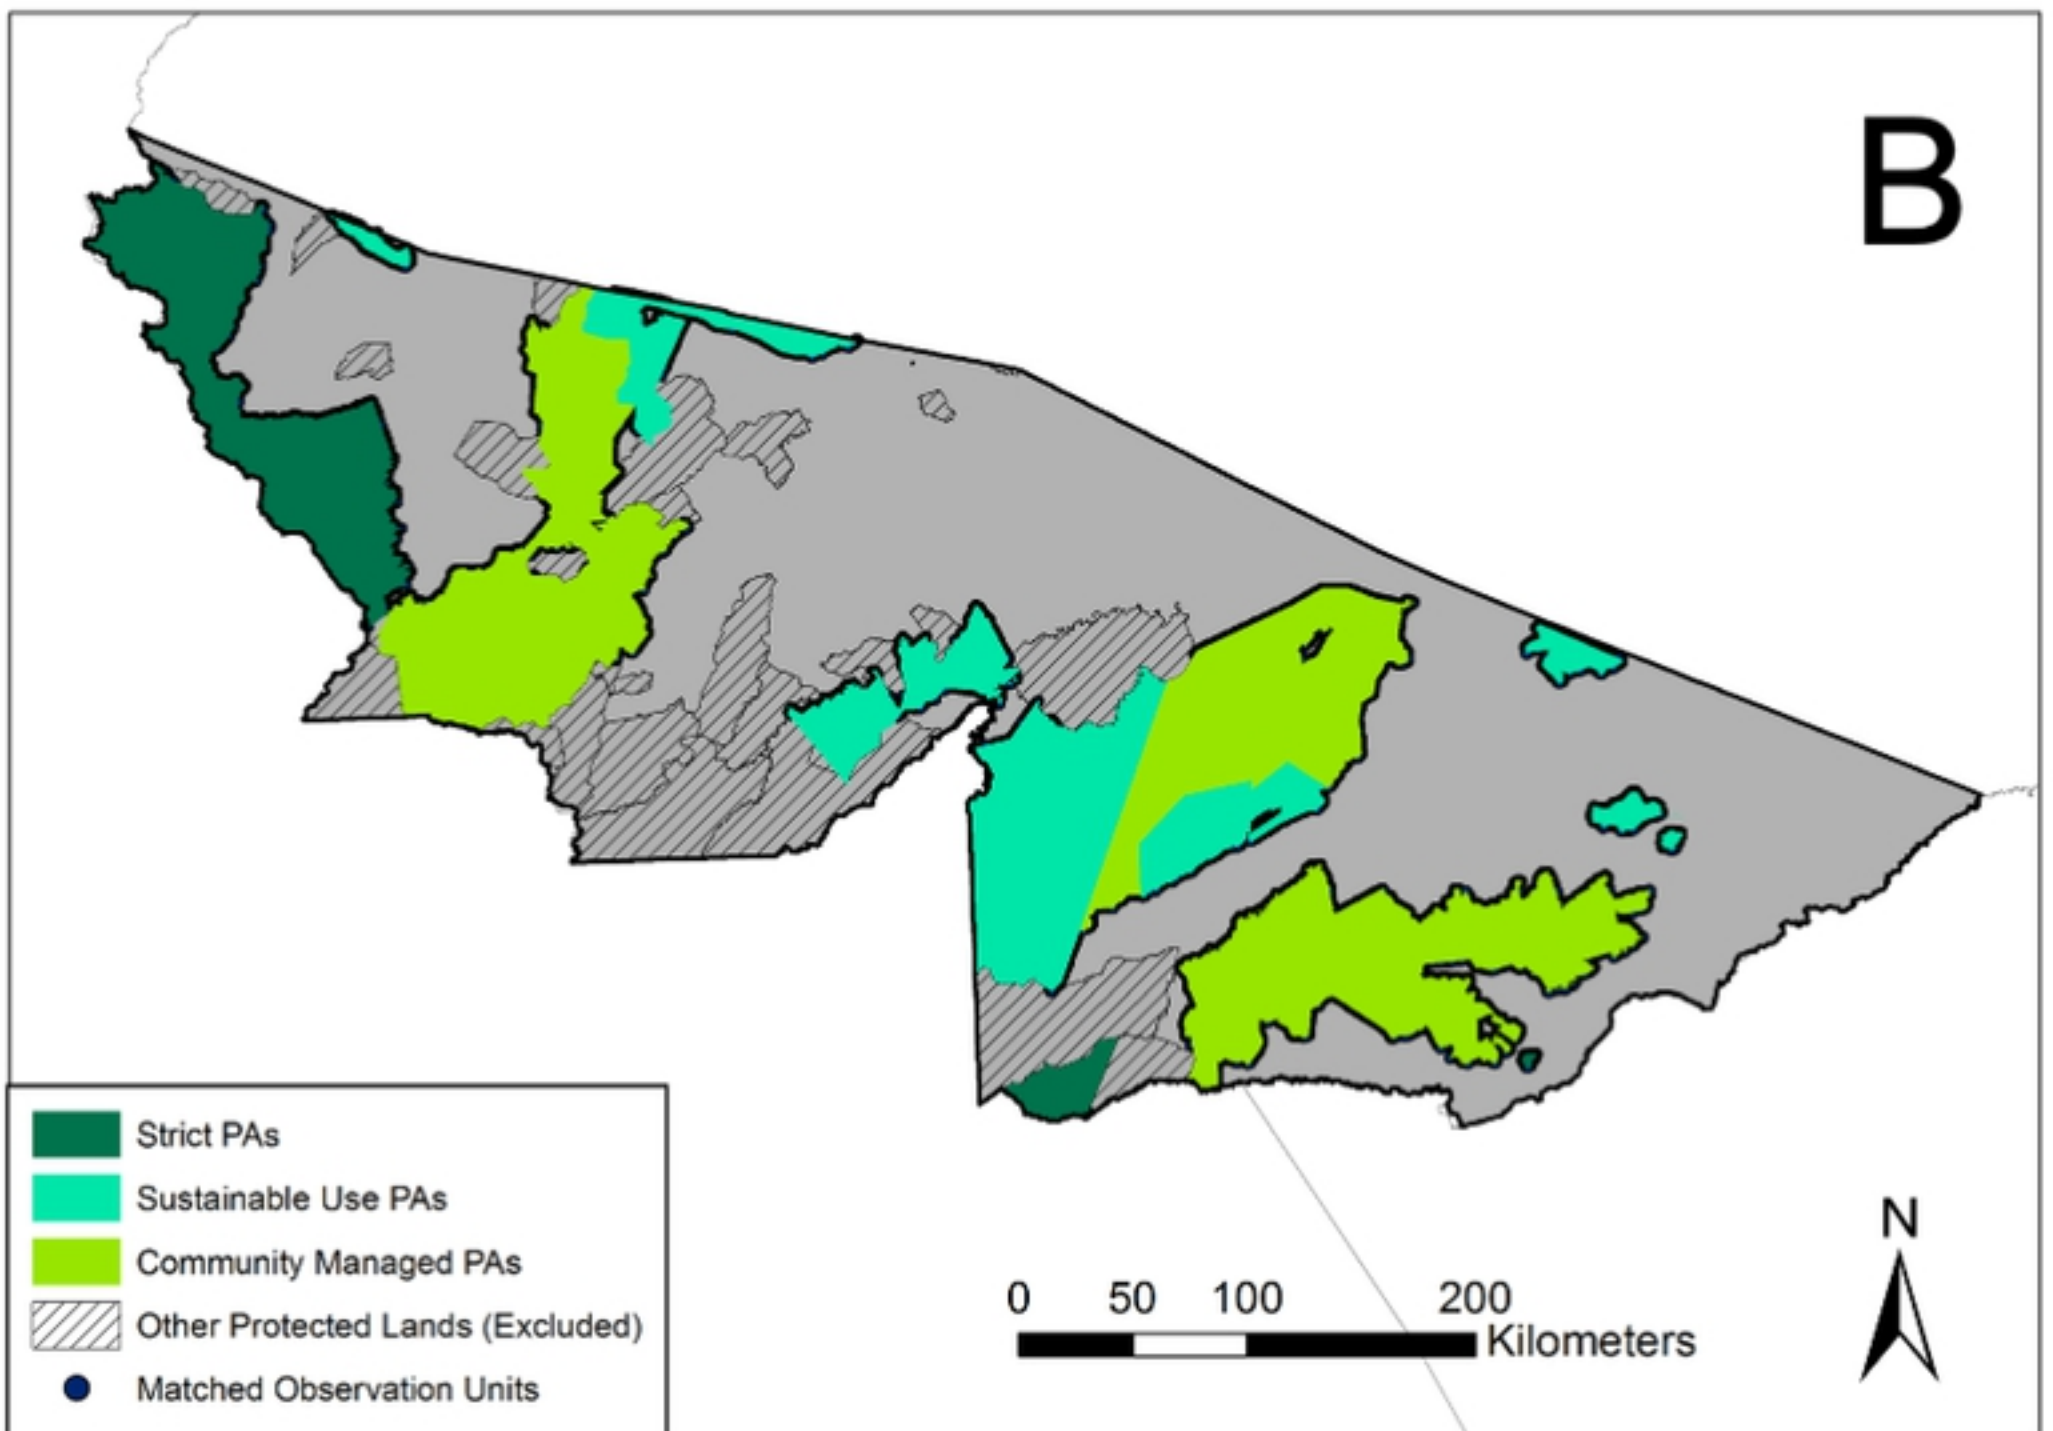

Fig 6



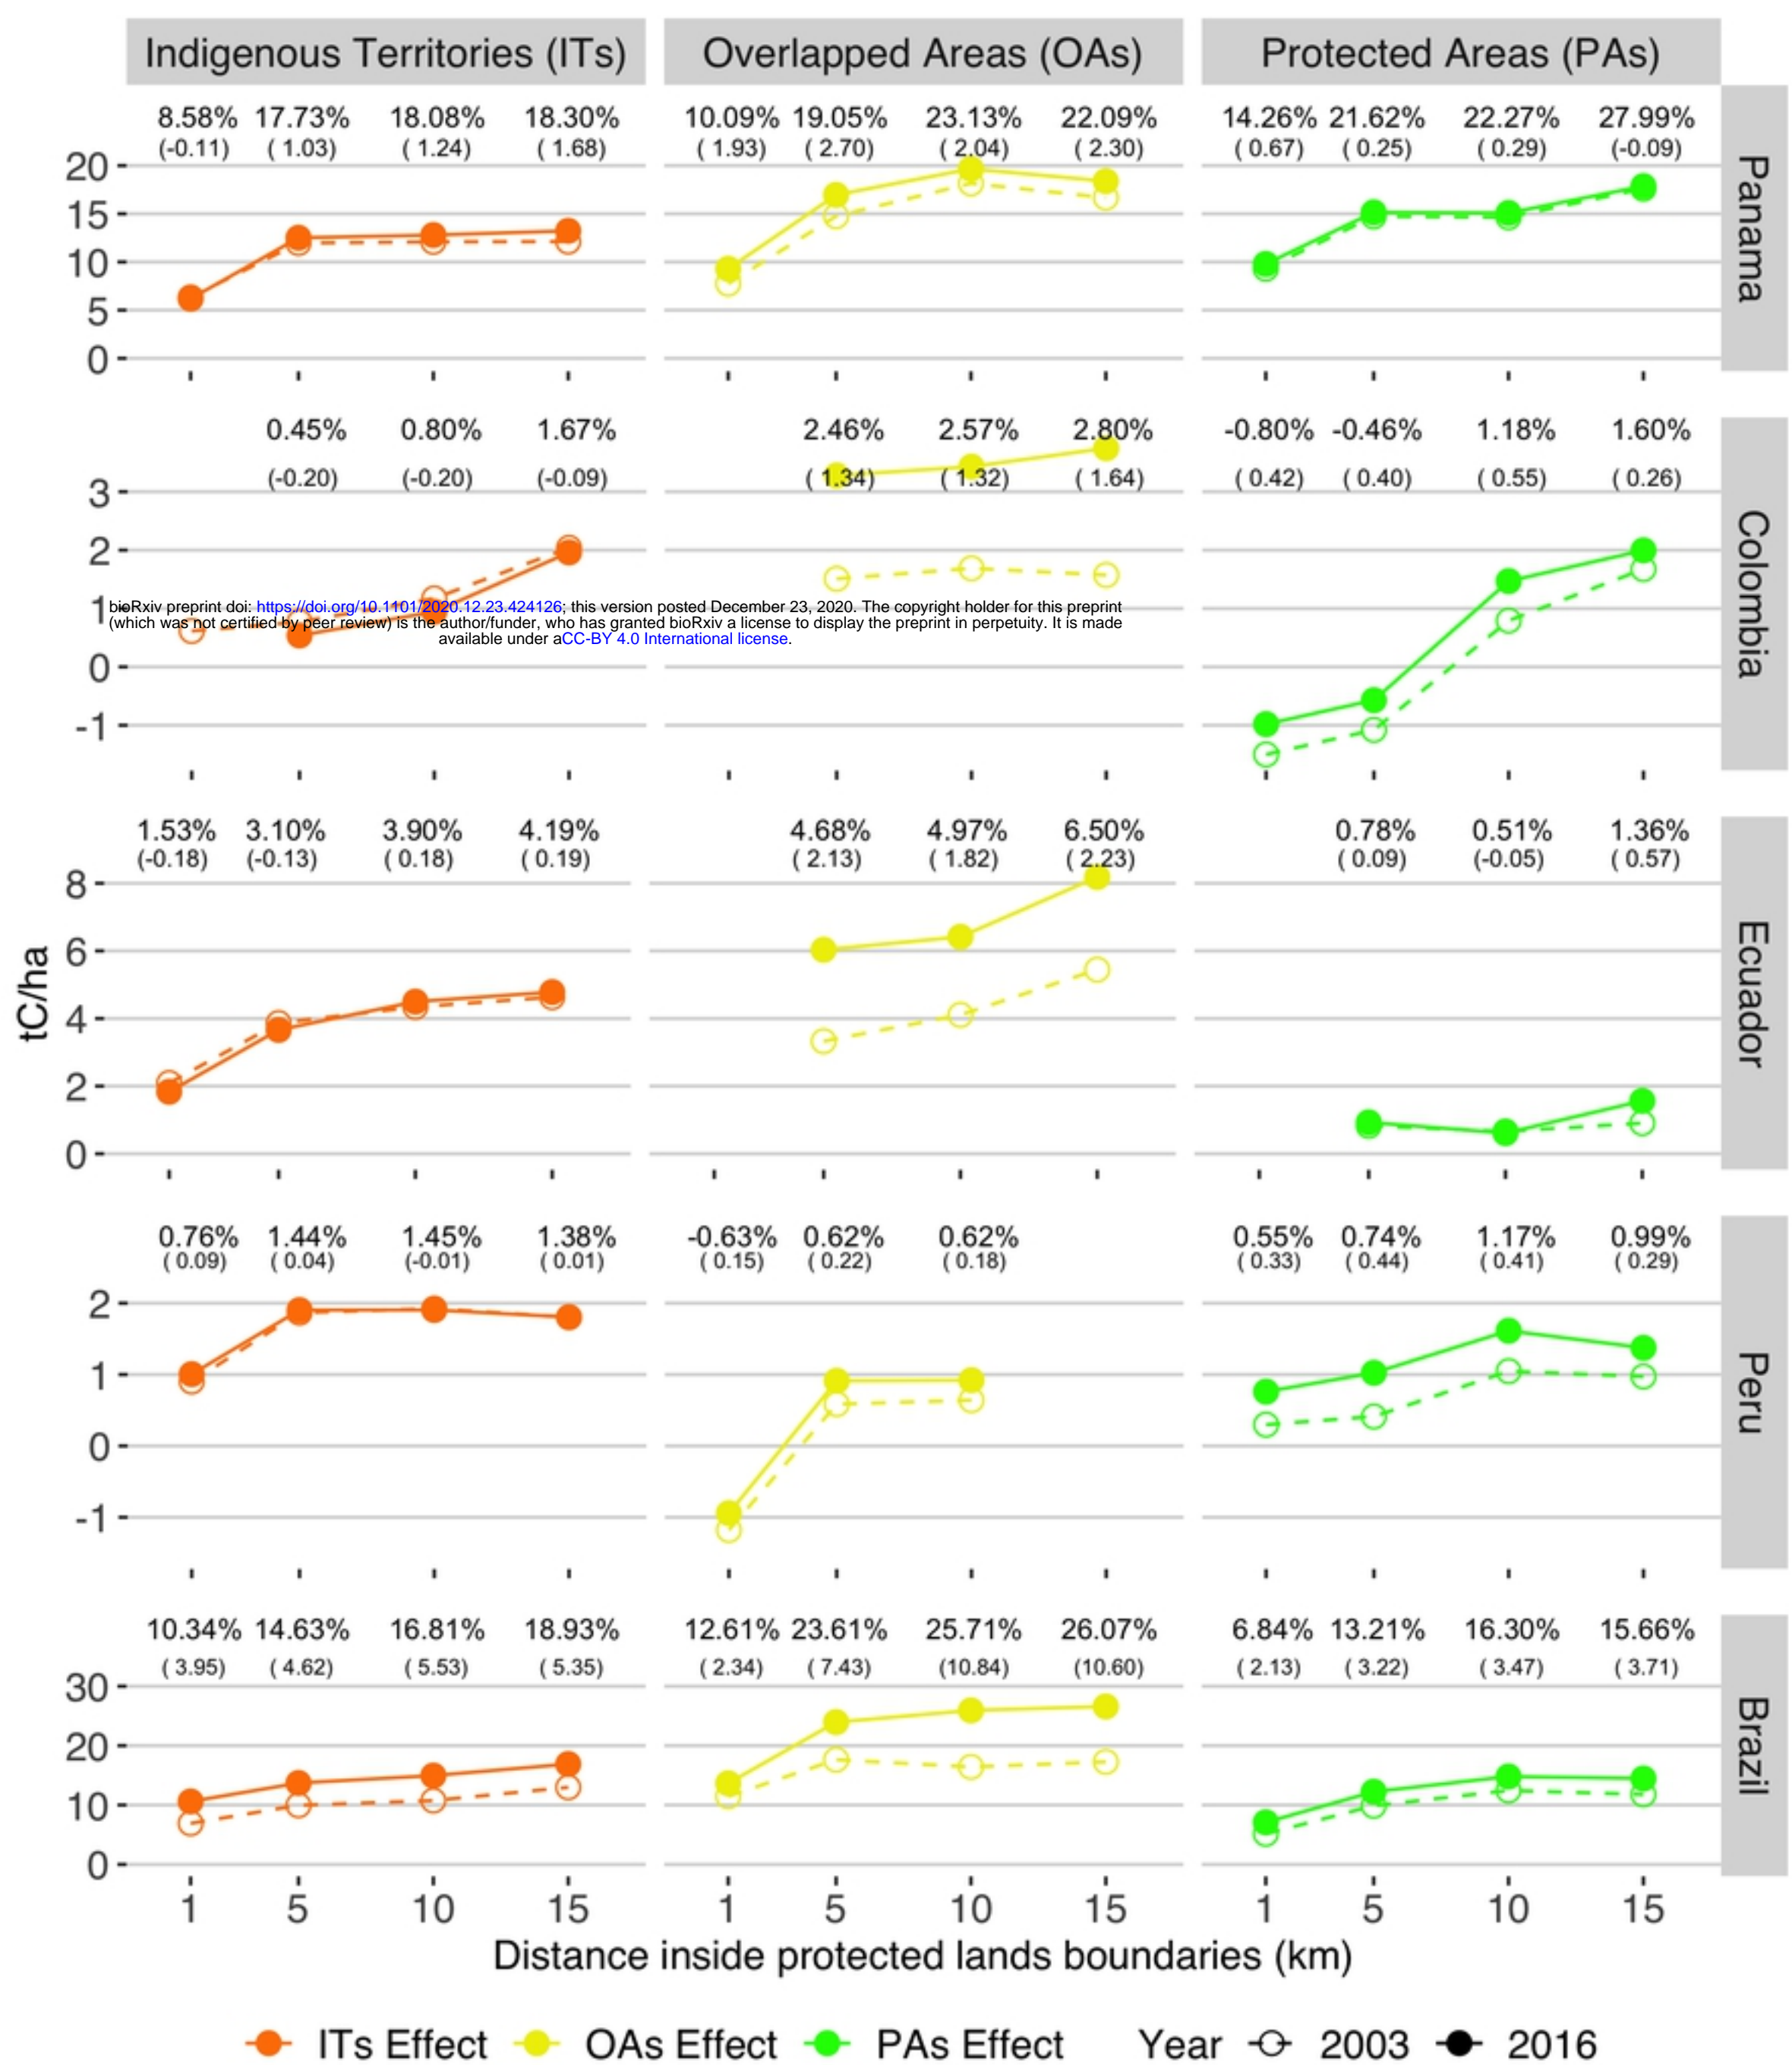

Fig 7



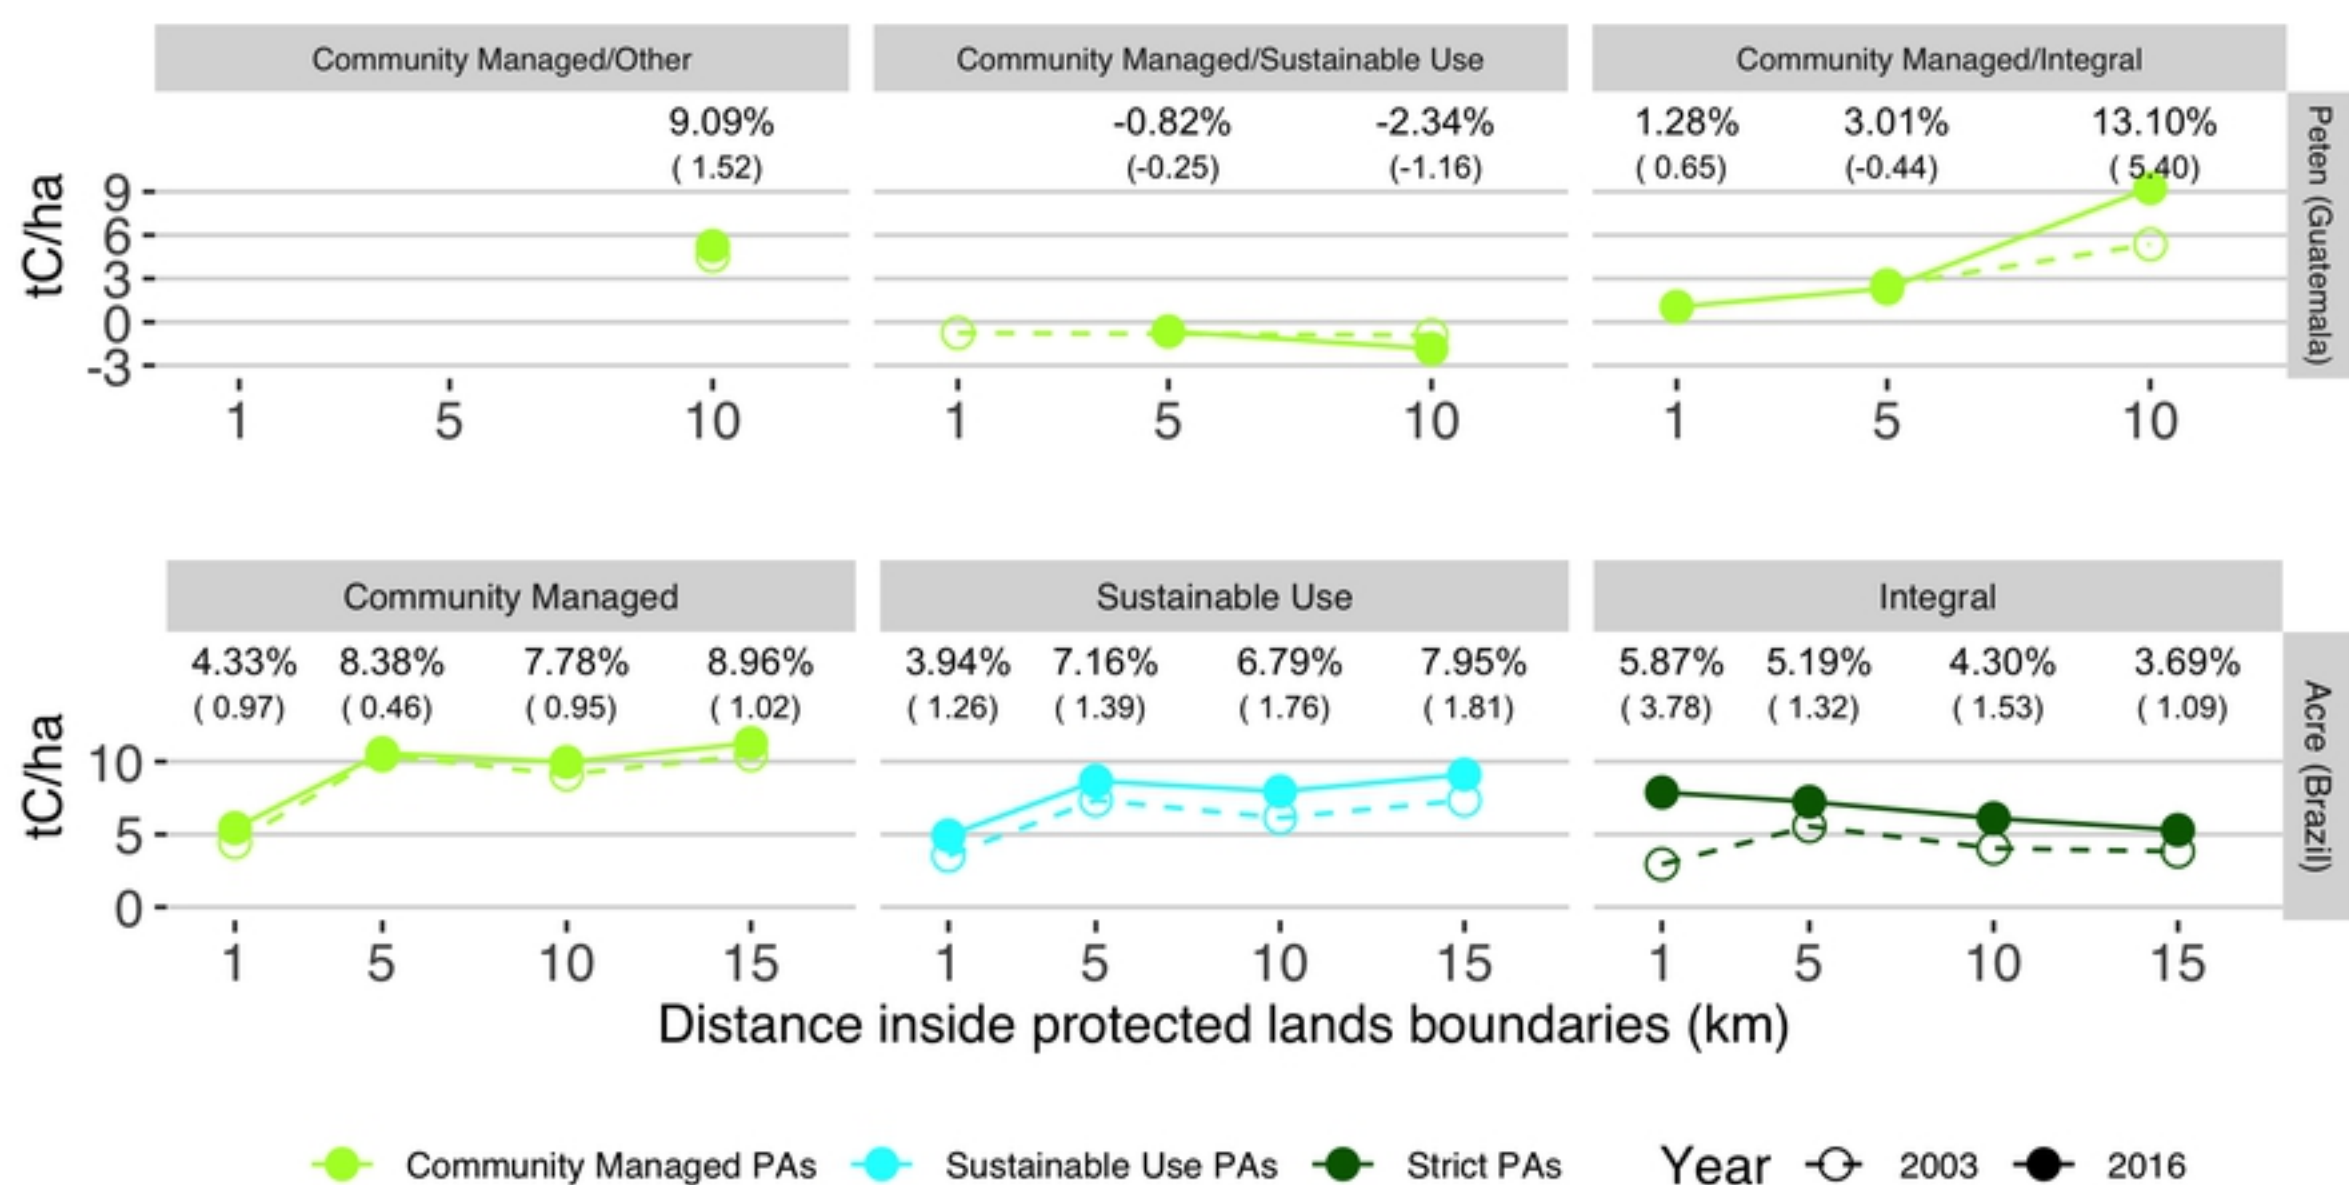

Fig 8
